# Supplementary material for: Four New Species of Dictyostelids from Soil Systems in Northern Thailand
Source: MDPI journal article supplement (doi:10.3390/jof8060593), 2022-05-31
Supplement: s1 [file s1]

## S1. Sequence alignment

>AM168070.1\_Cavenderia\_multistipes\_UK26b

catgcatgtctaagtatag--

tcctcacggacgaaactgcagacggctcattacaacggctcgctggcacaggacacggggcaactcgctgtggataaccgcat

taaatcggggctaatacatataaaacccgagtgagcactggggcaa-ctggaagttcgcgcgatgga---

ttaacccttcgactgacctct--tggtttggttgaaccgattcatgtttagtcggc-----

gcttcggcgccgatttgctagacgcgactgccctatcagcttgacggcaaggcttgcttgccgtggctgtaacgggtaacgg

agaattaggggttcgattccggagaggacgcctgagaaacggcgctccacacctacgggtggcagcaggcacgtaaatttcca

atgtcaata-

cgatgagggagcgcacaataaatacttttagtcctggctcgcaagatcagggtcaacaagattaagcacaaaagtaaataaattagcc

agtattattggagggaagctcgggtgccagcagccgcggtaattccagctccaacagtatataactaaagttgtgcagttcgttcg

tagcttaagctcgtgtaatgcttaagcgcggcgcggtagattgttctagtcggaggcgcggttcaactgtgcataaatcttgat

gctcaagggtgagtcaggcgtggacgggaaaacagtgcatggtattgtagaagaagacgtgcaacgtctaggttggttggttg

tccaggtaatgattaatagggaggagcgggggctgtcgtattgacgggcgagaggtgaaattcgttgacctgtcaagacgc

acaacggcggaagcagcagccaagtgccctccattagtcagaacgatagcttagggatcaaagacgatcagataaccgtcgt

agtctagaccataaactatgtcggctaacacttg--

cgacgtgctctccgaggcgtctccaggagttgtgggaaaccataagcttttgactctggggggagtatggccgcaagactg

aaacttaaaggaattgacggaagggcacaccatggcgtggagcctgcggcttaattgactcaacacgggaaaccttaccag

ctcagatatgtataggattgacagactaatagattttcatgatcgcataagtagtggtgcatggccgttcttagttggtggagtg

tttgtcaggtcaattccggtaacggacgagacctccatttgctaactagtcgcggcgacgggttcgactggcgaggggtcggac

ggcgcggtcgtcctgcgaagg-

ctgggtaagtgcgtctacgggttagtagcctgggctcgtcttcgcggaataaagtaacttcttagaaatacttccgacaccaagc

cggaggaagttggaggcaataacaggtctgtgatgcccttagatatcttggccgcacgcgtgctacaatgtagacgcgaata

agctctaaaaatgcgcggcggaagcgtcgcggaac-

agcaatcgtctacgtaacagggactgacggttgcaataacgatcacgaacgaggaatgcctttaggcgcgagtcacatctc

gcgccgaatctgtccctgccctttgtacacaccgcccgtcgtcctaccgatcggacggcgaggtgaagacgacggagggac

gcggaaagtcggttaaatgttgctagaggaag

>AM168092.1\_Cavenderia\_deminutiva\_MexM19A

catgcatgtctaagtataagtcctgtacgactagactgcagacggctcattacaacagttgtgtctacaggacatgcttt--

tgcgttttgataaccgcagtaaatcggggctaatacatataaacgaaggaatgactggta---

acggaagtttctgcgatgg--atttagctattcaaccggccttg----

tgtttgttgaaccgatccatattgctaactcggcattagtttactaatagcctgatgagctatgaacaactgccctatcaactgatg

gtaaggatttggttaccatggttgtaacgggtaacggggaatcagggttcgattccggagaggacgcctgagaaacggcgt

ccacatctacgggtggcagcaggcgcgtaaattaccaatctcaatagagaggaggtggcgacaataaatcctgatgcctata

gggtcacgcctagggcaattagaataagtacaaaataatccattaaccaatgtaattggagggcaagtcgtggtgccagcagc

cgcggtaattccagctccaatagcgtataactaatgttggtgcagttcgctcgtagcttaatttttagcta-

atcgtggcatgcacgtgctggttg-

gtttgttgagcaagcttagtcaactgtgcataaaccttgatgctcaaggtaaaagacgtaggtctgtgataactaagtcaggtat

tgtagaacatggtaacagggtggctttgttggtgggtcactagtgaatgattaataggaggagcgggggccttcatattgatg

ggcgagaggtgaaattcgttgacctatcaagatgtctacagcgaaagcattggccaagtcctctccattagtcagaacga

tagtttgggatcaaagacgatcagataaccgtcgtagtccaaaccataaacgatgtcgaccagtgattaggcacgtcaccttct

agagaactgccttaggaacttggtggaaaccatgagtttttgactctgggggagtatggtcgcaaggctgaaacttaaagg

aattgacggaagggcacaccatggagtggagcctgcggcttaattgactcaacacgggaaaacttaccagctctgatatgat

aaggattgacagactaaaagatctttcatgatcgcataagtgggtggatggtcggttcttagttgggtggagtgattgtcaggtc  
aattccggtaacggacgagacctcgacctgctaactagtgacaattagattgtcgatgggcaagttagttcggcagctacttaa  
-tgggcaactgttaggttagtgacgtattgattgtagcctggcaatgtagttgtt---  
atatttcttcttagagggacttccagcttaagtggaggaagtcgaggcaataacaggtctgtgatgcccttagatatcttgg  
gccgcacgcgtgctacaatgtaggcgctaataaggcattaccctttacct-----  
agaggtagaggtaacctacaatcccctacgtgatggggattgaccactgtaactgtggtcatcaacgaggaattcctttaggc  
gtgcgtcactatcgacgccgaatctgtccctgccctctgtacacaccgccgctcctaccgatcgaacgtccaggtaaaagtc  
gacggaagttgatagaaagtcattgaacgtcgttttagaggaag

>AM168081.1\_Cavenderia\_stellata\_SAB7B

catgcatgtctaagtataagctctgtacggctagactgcagacggctcattacaacggttgtagcttcaggacatgtcgcaag  
gccttctggataaccgcagtaaatcggggctaatacatataaacggaggggttagaggggcaaccttgaagcttctgcgatg  
gacacttagctattcgaccaaccccgcaaggagtggttgaacgggtcatattgctaactgactctagcttcttagtagtctga  
taagctatagacaactgccctatcaacttgatggttaaggttttggcttaccatggttataacgggtaacggggaatcaggggtcg  
attccggagaggacgcctgagaaacggcgtccacatctacgggtggcagcaggcgctaaattgcccaatctcaacagaga  
ggaggcggtgacaataaatcccgatggcttgggggcaacccaggccaatcagaataagtacacattaaatcccctaaccaa  
tataattggagggcaagtctggtgccagcagccggttaattccagctccaatagcatataactaatgttgttcagttcgctcgta  
gctcaattttgagctattacgggctcaacactgtaggtcactggtcttagggccatcgtaatcgactgtgcataaaccttgatgct  
caaggtaggcctctg-

ggggtagatacgcagtgcatggcattgtggaacaaggcatctcgcggcttagttggtgggcccgcgggggcaatgattaatag  
ggaggagcgggggcttcatattgcagggcgagaggtgaaattcgttgaccttgcaagatgtcctacagcgaaagcattgg  
ccaagtgcctctccattagtcaagaacgaaagtttggggatcaagacgatcagataaccgtcgtagtccaaaccataaaactagt  
cgaccagtgattaggcgggtaccttctcgagagctgcctagcaactgtgggaaccatgagtgcttgactctgggggga  
gtatggtcgcaaggctgaaactaaaggaattgacggaagggcacaccatggagtgagcctgcggttaatttgactcaaca  
cgggaaagcttaccaagctcagatatgataaggattgacagactaaaagatctttcatgatctcataagtggtggtgcatggtcg  
ttcttagttggtggagtgattgtcaggtcaattccggtaacggacgagacctcgacctgctaactagtggggctcattggtcaa  
atggcgaaagcgaattttgctttactatgggggcaaccattcatagtggggtagggagcgtattagcctgggcccagtggggttc  
aaaaaattaatcttctagaggtacttctggtctaaagccagaggaagtcgaggcaataacaggtctgtgatgcccttagatat  
cttgggcccgcacgcgtgctacaatgtaggcgctaatagtagcaacat-

tccagcaccgcaaggtgtctgtaatcttgaatcccctgcgtgattgggcttgaccactgtaactgtggtcatcaacgaggaatt  
ccttgatgcgcgagtcactatctcgcgcagaatctgtccctgccctttgtacacaccgccgctcctaccgatcgaacgatca  
ggtaaaagtgagcagagggttttgaagtccattgaacgccgttagaggaag

>AM168089.1\_Cavenderia\_mexicana\_MexTF4B1

catgcatgtctaagtataagctctgtacggctagactgcagacggctcattacaacggttgtatcttccaggacatgtcgaaaga  
ccttctggataaccgcagtaaatcggggctaatacatataaacggaggggtggatagggaaccttgaagcttctgcgatgga  
cacttagctattcgaccagccccgcaagggaacgggttgaacgggtcatattgctaactgactctggcttgccacgagctctgat  
aagctatagacaaccgccctatcaacttgatggttaaggttttggcttaccatggttgaacgggtaacggggaatcaggggtcga  
ttccggagaggacgcctgagaaacggcgtccacatctacgggtggcagcaggcgctaaattgcccaatctcaacagagag  
gaggcggtgacaataaatcccgatggcttgggggcaacccaggccaatcagaataagtacacattaaatcccctaaccaata  
taattggagggcaagtctggtgccagcagccggttaattccagctccaatagcatataactaatgttgcgcagttgcctcgtag  
cttaattttgagctattacgcggctcgacactgtaggtcgtcattgggggtagtgtcactatcgactgtgcataaaccttgatgctc  
aaggtaggcctttatagggtagatacacagtgcattgttgaacaaggcatctcgcggcttagttggtgggcccgcggg  
ggcaatgattaataggagggagcggggaccttcatattgcagggcgagaggtgaaattcgttgaccttgcaagatgaccga  
cagcgaagcattggtcaagtgccttccattagtaagaacgaaagtttggggatcaaagacgatcagataaccgtcgtagtcc  
aaaccataaactatgtcgaccagcgattaggcgggtaccttctcgagagctgcctagcagcttgtgggaaaccatgagtgctt

ggactctgggggggagtatggctgcaaggctgaaacttaaaggaattgacggaagggcacaccatggagtgagcctgcgg  
cttaatttgactcaacacgggaaagcttaccagctcagatatgataaggattgacagactaaaagatctttcatgatctcataagt  
gggtggtgcatggtcgcttcttagttggtggagtgattgtcagggtcaattccggtaacggacgagacctcgacctgtaactagt  
gggttcattcttcgctcgatgaggcaaggctgcttttattgcaggggtaactctttagtagggtaggctttgtattagtctgg  
gggagtgagctccaattataatcttctagagggtacttctggctctaagccagaggaagtcgagggaataacagggtctgtga  
tgccttagatatcttgggcccgcgcgtgctacaatgtaggcgctaagtagtcaacatatccagctccgtaaggagtgctgtaa  
tcttggaatcccctgctgattgggcttgactactgtaactgtggtcatcaacgaggaattccttgtagtgcgtgagtcactatctcac  
gcagaatctgtccctgccccttgtacacaccgcccgtcgctcctaccgatcgaacgatcaggtaaaagtggaacagaggggtttgg  
gaagtccattgaacgccgttagaggaag

>AM168084.1\_Cavenderia\_bifurcata\_UK5

catgcatgtctaagtataagctctgtacggctagactgcagacggctcattacaacgggtgtagctccaggacatgtcgcaag  
accttctggataaccgcagtaaatcggggctaatacatataacaggagggatggatagggcaacctgaagtttctgcatgg  
acacttagctattcgaccagccctgaacaggaatgggtggaacgggtcatattgctaactcgactctagctgtagcagtgctgat  
aagctatagacaaccgccctatcaacttgatggtaagggtttggcttaccatggttgtaacgggtaacggggaatcagggttcga  
ttccggagaggacgcctgagaaacggcgctccacatctacgggtggcagcaggcgctaaattgccaatctcaacagagag  
gaggcggtgacaataatcccgatggctttgggggcaacccaggccaatcagaataagtagacattaaatcccttaaccaata  
taattggagggcaagtctggtgccagcagccggttaattccagctccaatagcatataactaatgtgtgtagtgcgtcgtag  
ctcaattttgagcttttgcggctcaacactgtagggtcatcattagggatagtgatcataatcgactgtgcataaaccttgatgctca  
aggtaggcctttatagggcagatacacagtgcattgtggaacaaggcatctcgcggttagttgggtgggcccgcgggg  
gcaatgattaatagggaggagcgggggccttcatattgcagggcgagaggtgaaattcgttgaccttgcaagatgtccgac  
agcgaaagcattggccaagtgcctctccattagtcaagaacgaaagtttgggatcaaaagacgatcagataccgctgtagtcc  
aaaccataaactatgtcgaccagcgattagggcgctaccttctcgagagctgcctagcagctgtgggaaccatgagtgctt  
ggactctgggggggagtatggctgcaagctgaaacttaaaggaattgacggaagggcacaccatggagtgagcctgcgg  
cttaatttgactcaacacgggaaagcttaccagctcagatatgataaggattgacagactaaaagatctttcatgatctcataagt  
gggtggtgcatggtcgcttcttagttggtggagtgattgtcagggtcaattccggtaacggacgagacctcgacctgtaactagt  
gggttcattcttcgcttgacgaggcagggtttgtttgattacagaagggggtttttagtggggtagagttttagtagtctgg  
aggagtgagctcaaaaaataatcttctagagggtacttctggctctaagtcagaggaagtcgagggaataacagggtctgtg  
atgccctaaatatcttgggcccgcgcgtgctacaatgtaggcgctagaaagtcattaaaaccatctccgcaaggagtagtgga  
atcttataatcacctgctgattgggcttgaccactgtaactgtggtcatcaacgaggaattccttgtagtgcgcgagtcactatctc  
gcgcagaatctgtccctgccccttgtacacaccgcccgtcgctcctaccgatcgaacgatcaggtaaaagtggaacagagagctttt  
ggaagtccattgaacgccgttagaggaag

>AM168072.1\_Cavenderia\_granulophora\_CHII\_4

catgcatgtctaagtataagctctgtacggctagactgcagacggctcattacaacgggtgtatcttccaggacatgtcgcaaga  
tcttctggataaccgcagtaaatcggggctaatacatataacgaaggggagagagggcaacctgaagcttctgcatgg  
acacttagctattcgaccaaccccgaagggaatgggtggaacgggtcatattgctaactcgactctggtttaccatgagtc-  
gataagctatagacaaccgccctatcaacttgatggtaagggtttggcttaccatggttgtaacgggtaacggggaatcagggtt  
cgattccggagaggacgcctgagaaacggcgctccacatctacgggtggcagcaggcgctaaattgccaatctcaacaga  
gaggaggcggtgacaataaatcccgatggctttgggggcaacccaggccaatcagaataagtagacattaaatcccttaacc  
aatataattggagggaagctggtgccagcagccggttaattccagctccaatagcatataactaatgtgttgagttcgctc  
gtagcttaattttgagctattacgggctcaacactgtaggctcattgtagcaatagcatcataatcgactgtgcataaaccttgat  
gctcaaggtaggcctttttagggtagatacacagtgcattggtggaacaaggcatctcgcggttagttgggtgggcccgcg  
ggggcaatgattaatagggaggagcgggggccttcatattgcagggcgagaggtgaaattcgttgaccttgcaagatgtcc  
gacagcgaaagcattggccaagtgcctccccattagtcaagaacgaaagtttgggatcaaaagacgatcagataaccgctgtag  
tccagaccataaactatgtcgaccagcgattagggcggtaccttcttcgagagctgcctagcagctgtgggaaaccatgagt

gcttggactctggggggagtatggtcgcaaggctgaaactaaaggaattgacggaagggcacaccatggagtgagcctg  
cggcctaattgactcaacacgggaaagcttaccagctcagatatgataaggattgacagactaaaagatcttcatgatctcat  
aagtgggtgcatggctggttcttagttggtggagtgattgtcagggtcaattccggtaacggacgagacctcgacctgctaact  
agtgggattcattccttctctcgacgagggcaggttctgctttattgtaaggg --

caactttgcagtagggtaggattgtattagctctgggggagtggaattcatataattaatcttctagaggtagtcttggtctaagc  
cagaggaagttcgaggcaataacagggtctgtgatgcccttagatatctggggccgcacgcgtgtacaatgtaggcgctaag  
agtctttacatccagctccgtaaggagtctggaatcttggaatcccctgctgattgggcttgactactgtaactgtggcatcaa  
cgaggaattccttgatgcgcgagtcactatctcgcgagaatctgtccctgccctttgtacacaccgccgctgctctaccgatc  
gaacgatcaggtaaagtgacagagggcatttgaaagtcattgaacgccgttagaggaag

>AM168088.1\_Cavenderia\_medusoides\_OH592

catgcatgtctaagtataagctctgtacggctagactgcagacggctcattacaacgggtgtatctccagaacggtgcgcaaga  
tcttctggataaccgcagtaaatcggggctaatacatacaaacgaaggggtggagaggggaaccttgaagcttctgcgatgga  
cacttagctattcgaccaaccccgcaagggaatgggttgaacgggttcatattgctaatacgactctgggttaccatgagtc-  
gataagctatagacaaccgccctatcaacttgatggaaggttttggttaccatgggtgtaacgggtaacggggaatcagggtt  
cgattccggagaggacgcctgagaaacggcgctccacatctacgggtggcagcaggcgctaaattgccaatctcaacaga  
gaggagggcggtgacaataaatcccgatggctttgggggcaacccaggccaatcagaataagtacacattaaatcccttaacc  
aatataattggagggcaagtctggtgccagcagccggttaattccagctccaatagcatataactaatgtgttcagttcgctc  
gtagcttaattttgagctattacgcggctcaacactgtaggtcattactggaacagtatcataatcgactgtgcataaaccttgatg  
ctcaaggtaggccttttagggtagatacacagtgcattgtggaacaaggcatctcgcggttagttggtgggcccgcgg  
gggcaatgattaataggagggagcgggggccttcatattgcagggcgagaggtgaaattcgttgacccttgcaagatgtccg  
acagcgaaagcattggccaagtgcctccccattagtcagaacgaaagtttggggatcaaagacgatcagataccgctgtagt  
ccaaaccataaactatgtcgaccagcgattaggcgggctaccttctcgagagctgcctagcagcttgtgggaaaccatgagtg  
cttgactctggggggagtatggtcgcaaggctgaaactaaaggaattgacggaagggcacaccatggagtgagcctgc  
ggcttaatttgactcaacacgggaaagcttaccagctcagatatgataaggattgacagactaaaagatcttcatgatctcata  
agtgggtgcatggtcggttcttagttggtggagtgattgtcagggtcaattccggtaacggacgagacctcgacctgctaacta  
gtgggattcattcctcgctcgacgagggcaggttctgctttattgtagggg --

caactttacagtagggtaggattgtattagctctgggggagtggaattcatataattaatcttctaaaggtagtcttggtctaagc  
cagaggaagttcgaggcaataacagggtctgtgatgcccttagatatctggggccgcacgcgtgtacaatgtaggcgctaag  
agtctttacatccagctccgtaaggagtctggaatcttggaatcccctgctgattgggcttgactactgtaactgtggcatcaa  
cgaggaattccttgatgcgcgagtcactatctcgcgagaatctgtccctgccctttgtacacaccgccgctgctctaccgatc  
gaacgatcaggtaaagtgacagaggttttgaaagtcattgaacgccgttagaggaag

>AM168083.1\_Cavenderia\_aureostipes\_YA6

catgcatgtctaagtataagctctgtacggctagactgcagacggctcattacaacgggtgtatctccaggacatgtcgcaaga  
ccttctggataaccgcagtaaatcggggctaatacatacaaacggaggggtagagaggggaaccttgaagcttctgcgatgg  
acaattagtattcgaccaaccccgcaagggaatgggttgaacgggttcatattgctaatacgactctagcttgctagtagtctgata  
agctatagacaaccgccctatcaacttgatggtaaggttttggttaccatgggtgtaacgggtaacgggggaatcaggggtcgat  
tccggagaggacgctgagaaacggcgctccacatctacgggtggcagcaggcgctaaattgccaatctcaacagagagg  
aggcgggcacaataaatcccgatggctttgggggcaacccaggccaatcagaataagtacacattaaatcccttaaccaatat  
aattggagggcaagtctggtgccagcagccggttaattccagctccaatagcatataactaatgtgttcagttcgctcgtagc  
tcaattttgagc-

gtttcgcggctcaacactgtaggtcatagttagcaatagcttcataatcgactgtgcataaaccttgatgctcaaggtaggccttta  
tagggtagatacacagtgcattgtggaacaaggcatctcgcggttagttggtgggcccgcgggggcaatgattaata  
gggaggagcgggggccttcatattgcagggcgagaggtgaaattcgttgacccttgcaagatgtcctacagcgaaagcattg  
gccaaagtcctccccattagtcagaacgaaagtttggggatcaaagacgatcagataccgctgtagtccaaaccataaactat

gtcgaccagcgattaggcgggctaccttcttcgagagctgcctagcagcttggtggaaaccatgagtgcttgactctggggg  
gagtatggtcgcaaggctgaaactaaaggaattgacggaagggcacaccatggagtgagcctgctggcctaatttgactca  
acacgggaaagcttaccaagctcagatatgattaggattgacagactaaaagatcttcatgatctcataagtgggtggtcatgg  
tcgttcttagttggtggagtgattgtcaggtcaattccggtaacggacgagacctcgacctgctaactagtggtgattcattcttc  
gattgacgaggcaggttttgcttgattatagggggcaacttctatagtcgggtagagcttgattagctgggagagtgggttc  
aaaaaattaatcttctagaggtaacttctgctctaagccagaggaagtccgaggcaataacaggctgtgatgcccttagatat  
cttggggccgcacgctgtacaatgtaggcgctaatagtgttttacatccatctccgcaaggagtatggtaattcttgaatcccct  
gcgtgattgggcttgaccactgtaactgtggtcatcaacgaggaattccttgatgcgcgagtcactatctcgcgcagaatctgtc  
cctgccctttgtacacaccgcccgtcgtcctaccgatcgaacgatcaggtaaagtggacagagagtcttggaaagtcattgaa  
cgccgttagaggaag

>HQ141522.1\_Cavenderia\_myxobasis\_NT2A

catgcatgtctaagtataagctcttgtagcggtagactgcagacggctcattacaacggttgatcttccagggcattgctgcaaga  
ccttctggataaccgcagtaaatcggggctaatacatatacaaacggagggatggagagggcaacctgaagtttctgcatgga  
caattagttattctaccaaccccgcaagggaatggttgaaccgggttcattgctaactgactctagcttgctagtagtctgataa  
gctatagacaaccgccctatcaacttgatggaaggtttggcttaccatggttgaacgggtaacggggaatcagggttcgatt  
ccggagaggacgcctgagaaacggcgctccacatctacgggtggcagcaggcgctaaattgcccaatctcaacagagagg  
aggcgggtgacaataaatcccgatggcttgggggcaacccaggctaatacagaataagtacacattaaatcccttaaccaatat  
aattggagggcaagtctggtgccagcagccggttaattccagctccaatagcatataactaatgttgttcagttcgctcgtagc  
ttaattttgagctatatcggggctaacactgtaggctcatggctagcaatagttgcataatcgactgtgcataaaccttgatgctca  
aggtaggcctttatagggtagatacacagtgcattgttgaacaaggcatctcgggcttagttggtggccgcgggg  
gcaatgattaataggagggagcggggccttcatattgcagggcgagaggtgaaattcgttgacccttgaagatgtcctaca  
gcaaaagcattggccaagtgcctcccattagtaagaacgaaagttggggatcaaagacgatcagataccgtcgtagtcca  
aaccataaactatgtcgaccagcgattaggcggttaccttcttcgagagctgcctagcagcttggtggaaaccatgagtgctt  
ggactctggggggagatggtcgcaaggctgaaactaaaggaattgacggaagggcacaccatggagtgagcctgcgg  
cttaatttgactcaacacgggaaagcttaccagctcagatatgattaggattgacagactaaaagatcttcatgatctcataagt  
ggtggtgcatggtcgttcttagttggtggagtgattgtcaggtcaattccggtaacggacgagacctcgacctgctaactagtg  
ggattcattcttcgattgacgaggcaggtattgcttgattatagggggcaacttctatagtcgggtagtgcttgtagtagtctgg  
aggagtggatttcaaaaaattaatcttctagaggtaacttctggctctaagccagaggaagtccgagggaataacaggctctgtg  
atgcccttagatatcttggccgcacgcgtgctacaatgtaggcgctaatagtttttacatccatctccgcaaggagtatggtaa  
tcttgaatcacctgcgtgattgggcttgaccactgtaactgtggtcatcaacgaggaattccttgatgcgcgagtcactatctcg  
cgcagaatctgtcccttgccctttgtacacaccgcccgtcgtcctaccgatcgaacgatcaggtaaagtggacagaggggtacttg  
gaagtcattgaacgcggttagaggaag

>HQ141515.1\_Cavenderia\_subdiscoidea\_TH1A

catgcatgtctaagtataagctcttgtagcggtagactgcagacggctcattacaacggttgatcttccagggcattgctgcaaga  
ccttctggataaccgcagtaaatcggggctaatacatatacaaacggagggatggagagggcaacctgaagtttctgcatgga  
caattagttattcgaccaaccccgcaagggaatggttgaaccgggttcattgctaactgactctagcttgctagtagtctgataa  
gctatagacaaccgccctatcaacttgatggaaggtttggcttaccatggttgaacgggtaacggggaatcagggttcgatt  
ccggagaggacgcctgagaaacggcgctccacatctacgggtggcagcaggcgctaaattgcccaatctcaacagagagg  
aggcgggtgacaataaatcccgatggcttgggggcaacccaggctaatacagaataagtacacattaaatcccttaaccaatat  
aattggagggcaagtctggtgccagcagccggttaattccagctccaatagcatataactaatgttgttcagttcgctcgtagc  
ttaattttgagctatatcggggctaacactgtaggctcatggctagcaatagttgcataatcgactgtgcataaaccttgatgctca  
aggtaggcctttatagggtagatacacagtgcattgttgaacaaggcatctcgggcttagttggtggccgcgggg  
gcaatgattaataggagggagcggggccttcatattgcagggcgagaggtgaaattcgttgacccttgaagatgtcctaca  
gcaaaagcattggccaagtgcctcccattagtaagaacgaaagttggggatcaaagacgatcagataccgtcgtagtcca

aaccataaactatgtcgaccagcgattaggcgggctaccttctcgagagctgcctagcagcttgtgggaaaccatgagtgcctt  
ggactctggggggagatggtcgcaaggctgaaacttaaaggaattgacggaagggcacaccatggagtggagcctgcgg  
cttaatttgactcaacacgggaaagcttaccagctcagatatgattaggattgacagactaaaagatctttcatgatctcataagt  
gggtgtcatggtcgcttcttagttgggtggagtattgtcagggtcaattccggtaacggacgagacctcgacctgctaactagt  
ggattcattcttcgattgacgaggcagggtcttgcttgattatagggggcaacttctatagtcgggtagggtttgtagtagtctgg  
aggagtggatttcaaaaaattaatcttctagaggtacttctggctctaagccagaggaagtcgagggaataacagggtctgtg  
atgcccttagatatcttggggccgacgcgtgctacaatgtaggcgctaatagtttttacatccatctccgcaaggagtatggtaa  
tcttggaatcacctgcgtgattgggcttgaccactgtaactgtggtcatcaacgaggaattccttgatgcgcgagtcactatctcg  
cgcagaatctgtccctgccctttgtacacaccgccgtgcgtcctaccgatcgaacgatcaggtaaaagtggaagagggtacttg  
gaagtcattgaacgccg-ttagaggaag

>HQ141518.1\_Cavenderia\_pseudoaureostipes\_TH39A

catgcatgtctaagtataagctctgtacggctagactgcagacggctcattacaacgggtgtatcttcaggggcatgtcgcaaga  
ccttctggataaccgcagtaaactcggggctaatacatatacaaacggagggatggagagggcaacctgaagtttctgcatgga  
caattagttattcgaccaaccccgcaaggaatggttgaaccgggtcatattgctaactgactctagcttgtagtagtctgataa  
gctatagacaaccgccctatcaacttgatggttaaggtttggcttaccatggttgaacgggtaacggggaatcagggttcgatt  
ccggagaggacgcctgagaaacggcgctccacatctacgggtggcagcaggcgctaaattgcccaatctcaacagagagg  
aggcgggtgacaataaatcccgatggcttgggggcaacccaggctaatacagaataagtacacattaaatcccttaaccaatat  
aattggagggcaagtctggtgccagcagccgcgtaattccagctccaatagcatataactaatgttgttcagttcgctcgtagc  
ttaattttgagctatatcggggctcaactgtaggtcatggctagcaatagttgcataatcgactgtgcataaaccttgatgctca  
aggtaggcctttatagggtagatacacagtgcattgtggaacaaggcatctcgggcttagttgggtgggcccggggg  
gcaatgattaataggagggagcgggggcttcatattgcagggcgagaggtgaaattcgttgacccttgcaagatgtcctaca  
gcgaaagcattggccaagtgcctcccccttagtcaagaacgaaagtttgggatcaaagacgatcagataccgtcgtagtcca  
aaccataaactatgtcgaccagcgattaggcgggctaccttctcgagagctgcctagcagcttgtgggaaaccatgagtgcctt  
ggactctggggggagatggtcgcaaggctgaaacttaaaggaattgacggaagggcacaccatggagtggagcctgcgg  
cttaatttgactcaacacgggaaagcttaccagctcagatatgattaggattgacagactaaaagatctttcatgatctcataagt  
gggtgtcatggtcgcttcttagttgggtggagtattgtcagggtcaattccggtaacggacgagacctcgacctgctaactagt  
ggattcattcttcgattgacgaggcagggtcttgcttgattacagggggcaacttctgtagtcgggtacgggtttagtagtctgg  
aggagtgggttcaaaaaattaatcttctagaggtacttctggctctaagccagaggaagtcgagggaataacagggtctgtg  
atgcccttagatatcttggggccgacgcgtgctacaatgtaggcgctaatagtttttacatccatctccgcaaggagtatggtaa  
tcttggaatcacctgcgtgattgggcttgaccactgtaactgtggtcatcaacgaggaattccttgatgcgcgagtcactatctcg  
cgcagaatctgtccctgccctttgtacacaccgccgtgcgtcctaccgatcgaacgatcaggtaaaagtggaagagggtacttg  
gaagtcattgaacgccg-ttagaggaag

>HQ141523.1\_Cavenderia\_bhumiboliana\_THC11X

catgcatgtctaagtataagctctgtacggctagactgcagacggctcattacaacgggtgtatcttcaggggcatgtcgcaaga  
ccttctggataaccgcagtaaactcggggctaatacatatacaaacggagggatggagagggcaacctgaagtttctgcatgga  
caattagttattcgaccaaccccgcaaggaatggttgaaccgggtcatattgctaactgactctagcttgtagtagtctgataa  
gctatagacaaccgccctatcaacttgatggttaaggtttggcttaccatggttgaacgggtaacggggaatcagggttcgatt  
ccggagaggacgcctgagaaacggcgctccacatctacgggtggcagcaggcgctaaattgcccaatctcaacagagagg  
aggcgggtgacaataaatcccgatggcttgggggcaacccaggctaatacagaataagtacacattaaatcccttaaccaatat  
aattggagggcaagtctggtgccagcagccgcgtaattccagctccaatagcatataactaatgttgttcagttcgctcgtagc  
ttaattttgagctatatcggggctcaactgtaggtcatggctagcaatagttgcataatcgactgtgcataaaccttgatgctca  
aggtaggcctttatagggtagatacacagtgcattgtggaacaaggcatctcgggcttagttgggtgggcccggggg  
gcaatgattaataggagggagcgggggcttcatattgcagggcgagaggtgaaattcgttgacccttgcaagatgtcctaca  
gcgaaagcattggccaagtgcctcccccttagtcaagaacgaaagtttgggatcaaagacgatcagataccgtcgtagtcca

aaccataaactatgtcgaccagcgattaggcgggctaccttcttcgagagctgcctagcagcttggtgggaaaccatgagtgcctt  
ggactctggggggagatggtcgcaaggctgaaacttaaaggaattgacggaagggcacaccatggagtggagcctgcgg  
cttaatttgactcaacacgggaaagcttaccagctcagatatgattaggattgacagactaaaagatctttcatgatctcataagt  
ggtggtgcatggtcggttcttagttggtggagtgttgcagggtcaattccggtaacggacgagacctcgacctgctaactagt  
ggattcattcttcgattgacgaggcagggtcttgccttgattatagggggcaacttctatagtcgggtacgggttgtagtagtctgg  
aggagtggatttcaaaaaattaatcttctagaggtacttctggctctaagccagaggaagtcggagggaataacagggtctgtg  
atgcccttagatatcttggggccgacgcgtgctacaatgtaggcgctaatagtttttacatccatctccgcaaggagtaggtaa  
tcttggaaacacctgctgattgggcttgaccactgtaactgtggtcatcaacgaggaattccttgatgcgcgagtcactatctcg  
cgcagaatctgtccctgccctttgtacacaccgccgtgcgtcctaccgatcgaacgatcaggtaaagtggacagaggggttctg  
gaagtcattgaacgccgttagaggaag

>AM168087.1\_Cavenderia\_fasciculata\_SH3

catgcatgtctaagtataagctctgtacggctagactgcagacggctcattacaacgggtgtatcttacagggcatgtcgcaaga  
ccttctggataaccgcagtaaactcggggctaatacatataaacggagggatggagagggtaaccttgaaagtttctgcgatgga  
catttagctattcgaccaaccccgcaagggaatggttgaaccgggtcatattgctaatacgactctagcttgctagtagtctgataa  
gctatagacaaccgccctatcaacttgatggttaaggtttggcttaccatggttgaacgggtaacggggaatcagggttcgatt  
ccggagaggacgcctgagaaacggcgctccacatctacgggtggcagcaggcgcgtaaattgcccaatctcaacagagagg  
aggcgggtgacaataaatcccgatggcttgggggcaacccaggctaatacagaataagtacacattaaatcccttaaccaatat  
aattggagggcaagtctggtgccagcagccgcggaattccagctccaatagcatataactaatgttgttcagttcgctcgtagc  
ttaattttgagctatatcggggctcaactgtaggtcatggctagcaatagttgcataatcgactgtgcataaaccttgatgctca  
aggtaggcctttatagggtagatacacagtgcattgtggaacaaggcatctcgggcttagttggtgggcccggggg  
gcaatgattaataggagggagcgggggcttcatattgcagggcgagaggtgaaattcgttgacccttgcaagatgtcctaca  
gcgaaagcattggccaagtgcctcccattagtaagaacgaaagtttgggatcaaagacgatcagataccgtcgtagtcca  
aaccataaactatgtcgaccagcgattaggcgggctaccttcttcgagagctgcctagcagcttggtgggaaaccatgagtgcctt  
ggactctggggggagatggtcgcaaggctgaaacttaaaggaattgacggaagggcacaccatggagtggagcctgcgg  
cttaatttgactcaacacgggaaagcttaccagctcagatatgattaggattgacagactaaaagatctttcatgatctcataagt  
ggtggtgcatggtcggttcttagttggtggagtgttgcagggtcaattccggtaacggacgagacctcgacctgctaactagt  
ggattcattcttcgattgacgaggcagggtattgcttgccttgattatagggggcaactttatagtcgggtagtgcttgattagctggg  
agagtgggtttcaataattaatcttctagaggtacttctggctctaagccagaggaagtcggagggaataacagggtctgtgat  
gcccttagatatcttggggccgacgcgtgctacaatgtaggcgctaatagtttttacatccatctccgcaaggagtaggtaatct  
tggaatcccctgctgattgggcttgaccactgtaactgtggtcatcaacgaggaattccttgatgcgcgagtcactatctcgcg  
cagaatctgtccctgccctttgtacacaccgccgtgcgtcctaccgatcgaacgatcaggtaaagtggacagaggggttgttga  
agtccattgaacgccgttagaggaag

>AM168093.1\_Cavenderia\_delicata\_TNS\_C\_226

catgcatgtctaagtataagctctgtacggctagactgcagacggctcattacaacgggtgtatcttacagggcatgtcgcaaga  
ccttctggataaccgcagtaaactcggggctaatacatataaacggagggatggagagggtaaccttgaaagtttctgcgatgga  
catttagctattcgaccaaccccgcaagggaatggttgaaccgggtcatattgctaatacgactctagcttgctagtagtctgataa  
gctatagacaaccgccctatcaacttgatggttaaggtttggcttaccatggttgaacgggtaacggggaatcagggttcgatt  
ccggagaggacgcctgagaaacggcgctccacatctacgggtggcagcaggcgcgtaaattgcccaatctcaacagagagg  
aggcgggtgacaataaatcccgatggcttgggggcaacccaggctaatacagaataagtacacattaaatcccttaaccaatat  
aattggagggcaagtctggtgccagcagccgcggaattccagctccaatagcatataactaatgttgttcagttcgctcgtagc  
ttaattttgagctatatcggggctcaactgtaggtcatggctagcaatagttgcataatcgactgtgcataaaccttgatgctca  
aggtaggcctttatagggtagatacacagtgcattgtggaacaaggcatctcgggcttagttggtgggcccggggg  
gcaatgattaataggagggagcgggggcttcatattgcagggcgagaggtgaaattcgttgacccttgcaagatgtcctaca  
gcgaaagcattggccaagtgcctcccattagtaagaacgaaagtttgggatcaaagacgatcagataccgtcgtagtcca

aaccataaactatgtcgaccagcgattaggcgggctaccttctcgagagctgcctagcagcttggtgggaaaccatgagtgctt  
ggactctggggggagatggtcgcaaggctgaaacttaaaggaattgacggaagggcacaccatggagtgagcctgcgg  
cttaatttgactcaacacgggaaagcttaccagctcagatatgattaggattgacagactaaaagatctttcatgatctcataagt  
ggtggtgcatggtcggttcttagttggtggagtgattgtcagggtcaattccggtaacggacgagacctcgacctgctaactagt  
ggattcattcttcgattgacgaggcaggtattgctttgattatagggggcaactttatagtcgggtagtgcttgattagctctggg  
agagtgggtttcaaataattaatcttcctagaggtacttctggctctaagccagaggaagtccgaggcaataacaggtctgtgat  
gcccttagatatcttgggcccgcacgcgtgctacaatgtaggcgctaagagttttacatccatctccgcaaggagatggtaatct  
tggaatcccctgctgattgggcttgaccactgtaactgtggtcatcaacgaggaattccttgatgcgcgagtcactatctcgcg  
cagaatctgtccctgccctttgtacacaccgccgctgcctaccgatcgaacgatcaggtaaagtggacagagaggttttga  
agtcattgaacgccgttttagaggaag

>AM168086.1\_Cavenderia\_fasciculata\_SmokOW9A

catgcatgtctaagtataagctctgtacggctagactgcagacggctcattacaacggttgtatcttacagggcatgtcgcaaga  
ccttctggataaccgcagtaaactcggggctaatacatataaaacggagggatggagagggcaacctgaagtttctgcgatgga  
catttagctattcgaccaaccccgcaaggaatggttgaaccgggtcatattgctaactgactctagcttgctagtagtctgataa  
gctatagacaaccgccctatcaacttgatggttaaggttttggttaccatggttgaacgggtaacggggaatcaggggtcgatt  
ccggagaggacgcctgagaaacggcgctccacatctacgggtgagcagggcgtaaatgcccaatctcaacagagagg  
aggcgggtgacaataaatcccgatggcttgggggcaacccaggttaatcagaataagtacacattaaatcccttaaccaatat  
aattggagggcaagtctggtgccagcagccgcggcaattccagctccaatagcatataactaatgttgttcagttcgctcgtagc  
ttaattttgagctatatcgcggtcaacactgtaggctcatggctagcaatagttgcataatcgactgtgcataaaccttgatgctca  
aggtaggcctttatagggtagatacacagtgcattgttgaacaaggcatctcgcggttagttggtgggcccggggg  
gcaatgattaataggagggagcgggggcttcatattgcagggcgagaggtgaaattcgttgacccttgcaagatgtcctaca  
gcaaaagcattggccaagtgcctcccattagtcagaacgaaagtttgggatcaaagacgatcagataccgtcgtagtcca  
aaccataaactatgtcgaccagcgattaggcgggctaccttctcgagagctgcctagcagcttggtgggaaaccatgagtgctt  
ggactctggggggagatggtcgcaaggctgaaacttaaaggaattgacggaagggcacaccatggagtgagcctgcgg  
cttaatttgactcaacacgggaaagcttaccagctcagatatgattaggattgacagactaaaagatctttcatgatctcataagt  
ggtggtgcatggtcggttcttagttggtggagtgattgtcagggtcaattccggtaacggacgagacctcgacctgctaactagt  
ggattcattcttcgattgacgaggcaggtattgctttgattatagggggcaactttatagtcgggtagtgcttgattagctctggg  
agagtgggtttcaaataattaatcttcctagaggtacttctggctctaagccagaggaagtccgaggcaataacaggtctgtgat  
gcccttagatatcttgggcccgcacgcgtgctacaatgtaggcgctaagagttttacatccatctccgcaaggagatggtaatct  
tggaatcccctgctgattgggcttgaccactgtaactgtggtcatcaacgaggaattccttgatgcgcgagtcactatctcgcg  
cagaatctgtccctgccctttgtacacaccgccgctgcctaccgatcgaacgatc-

ggtaaagtggacagaggggttttgaagtcattgaacgccgttttagaggaag

>HQ141516.1\_Cavenderia\_sp.\_TAS30A

catgcatgtctaagtataagctctgtacggctagactgcagacggctcattacaacggttgtatcttacagggcatgtcgcaaga  
ccttctggataaccgcagtaaactcggggctaatacatataaaacggagggatggagagggcaacctgaagtttctgcgatgga  
catttagctattcgaccaaccccgcaaggaatggttgaaccgggtcatattgctaactgactctagcttgctagtagtctgataa  
gctatagacaaccgccctatcaacttgatggttaaggttttggttaccatggttgaacgggtaacggggaatcaggggtcgatt  
ccggagaggacgcctgagaaacggcgctccacatctacgggtgagcagggcgtaaatgcccaatctcaacagagagg  
aggcgggtgacaataaatcccgatggcttgggggcaacccaggttaatcagaataagtacacattaaatcccttaaccaatat  
aattggagggcaagtctggtgccagcagccgcggtaattccagctccaatagcatataactaatgttgttcagttcgctcgtagc  
ttaattttgagctatatcgcggtcaacactgtaggctcatggctagcaatagttgcataatcgactgtgcataaaccttgatgctca  
aggtaggcctttatagggtagatacacagtgcattgttgaacaaggcatctcgcggttagttggtgggcccggggg  
gcaatgattaataggagggagcgggggcttcatattgcagggcgagaggtgaaattcgttgacccttgcaagatgtcctaca  
gcaaaagcattggccaagtgcctcccattagtcagaacgaaagtttgggatcaaagacgatcagataccgtcgtagtcca



aaccataaactatgtcgaccagcgattaggcgggctaccttctcgagagctgcctagcagcttggtgggaaaccatgagtgctt  
ggactctggggggagatggtcgcaaggctgaaacttaaaggaattgacggaagggcacaccatggagtgagcctgcgg  
cttaatttgactcaacacgggaaagcttaccagctcagatatgattaggattgacagactaaaagatctttcatgatctcataagt  
ggtggtgcatggtcgcttcttagttggtggagtgattgtcagggtcaattccggtaacggacgagacctcgacctgctaactagt  
ggattcattcttcgattgacgaggcaggtattgctttgattatagggggcaactttatagtcgggtagtgcttgattagctctggg  
agagtgggtttcaaataattaatcttcctagaggtacttctggctctaagccagaggaagtccgaggcaataacaggtctgtgat  
gcccttagatatcttgggcccgcacgcgtgctacaatgtaggcgctaagagttttacatccatctccgcaaggagtatggtaatct  
tggaatcccctgctgattgggcttgaccactgtaactgtggtcatcaacgaggaattccttgatgcgcgagtcactatctcgcg  
cagaatctgtccctgccctttgtacacaccgccgctgctctaccgatcgaacgatcaggtaaagtggacagaggggttttga  
agtccattgaacgccg-ttagaggaag

>AM168080.1\_Cavenderia\_antarctica\_NZ43B

catgcatgtctaagtataagctctgtacggctagactgcagacggctcattacaacggttgatcttacagggcattgctgcaaga  
ccttctggataaccgcagtaaactcggggctaatacatatacaaacggaggggatggagagggcaacctgaagtttctgcatgga  
catttagctattcgaccaaccccgcaaggaatggttgaaccggttcatattgctaactgactctagcttgctagtagtctgataa  
gctatagacaaccgccctatcaacttgatggttaaggtttggcttaccatggttgaacgggtaacggggaatcagggttcgatt  
ccggagaggacgcctgagaaacggcgctccacatctacgggtggcagcaggcgctaaattgcccaatctcaacagagagg  
aggcggtgacaataaatcccgatggcttgggggcaacccaggttaacagaataagtacacattaaatcccttaaccaatat  
aattggagggcaagtctggtgccagcagccggttaattccagctccaatagcatataactaatgttgttcagttcgctcgtagc  
ttaattttgagctatatcgcggtcaacactgtaggctcatggctagcaatagttgcataatcgactgtgcataaaccttgatgctca  
aggtaggcctttatagggtagatacacagtgcattgtggaacaaggcatctcgcggttagttggtgggcccggggg  
gcaatgattaataggaaggagcgggggcttcatattgcagggcgagaggtgaaattcgttgacccttgaagatgtcctaca  
gcaaaagcattggccaagtgcctcccattagtaagaacgaaagtttgggatcaaagacgatcagataccgtcgtagtcca  
aaccataaactatgtcgaccagcgattaggcgggctaccttctcgagagctgcctagcagcttggtgggaaaccatgagtgctt  
ggactctggggggagatggtcgcaaggctgaaacttaaaggaattgacggaagggcacaccatggagtgagcctgcgg  
cttaatttgactcaacacgggaaagcttaccagctcagatatgattaggattgacagactaaaagatctttcatgatctcataagt  
ggtggtgcatggtcgcttcttagttggtggagtgattgtcagggtcaattccggtaacggacgagacctcgacctgctaactagt  
ggattcattcttcgattgacgaggcaggtattgctttgattatagggggcaactttatagtcgggtagtgcttgattagctctggg  
agagtgggtttcaaataattaatcttcctagaggtacttctggctctaagccagaggaagtccgaggcaataacaggtctgtgat  
gcccttagatatcttgggcccgcacgcgtgctacaatgtaggcgctaagagttttacatccatctccgcaaggagtatggtaatct  
tggaatcccctgctgattgggcttgaccactgtaactgtggtcatcaacgaggaattccttgatgcgcgagtcactatctcgcg  
cagaatctgtccctgccctttgtacacgccgcccgtcgtctctaccgatcgaacgatcaggtaaagtggacagaggggttttga  
agtccattgaacgccgttagaggaag

>HQ141519.1\_Cavenderia\_macrocarpa\_MGE2

catgcatgtctaagtataagccctgtacggctagactgcagacggctcattacaacggttgcatctccagagcatgtcgcaag  
accttctggataaccgcagtaaactcggggctaatacatatacaaacggaggggtggaccagggaactgggaaacttctgcatg  
gacacttagctattcgactgaccttctgggggaatggttgaaccggttcatattgctaactgatttggttgccacaagtctgat  
aagctataggaaccgccctatcaacttgatggttaaggtttggcttaccatggttgaacgggtaacggggaatcagggttcg  
attccggagaggacgcctgagaaacggcgctccacatctacgggtggcagcaggcgctaaattgcccaatctcaatagagag  
gaggcgggtgacaataaatcccaatgaccatgggggcaaccccggtcaattagaataagtacacattaaataccctaaccaat  
ataattggagggcaagtctggtgccagcagccggttaattccagctccaatagcgtataactaatgttgttcagttcgctcgtga  
gctaattgatggcaattcttaggcc--  
agcaagtaggtagtggtcatgaggggtgttcgacgatcactgtgcataaaccttgatgctcaaggtaaactcttctgaaagat  
acacggtgcatggcattgtggaatatggcgtttgtgctctgttggtgggacacaagagcaatgattaataggaggagcgg  
gggccttcatattgccgggcgagaggtgaaattcgttgacctggcaagatgtcctacagcgaaagcattggccaagtgcctct

ccattagtcagaacgaaagtttggggatcaaagacgatcagataccgtcgtagtccaaaccataaactatgtcgaccagcgat  
taggttcgccaccttcttcgagagcaacctggcagcttgtgggaaccatgagttcttgactctggggggagtatggtcgcaa  
ggctgaaactaaaggaattgacggaagggcacaccatggagtgagcctgcggttaatttgactcaacacgggaaagctt  
accaagctcagatatgataaggattgacagacaaaagatctttcatgatctcataagtgggtggtgcatggccgttcttagttggt  
ggagtgtttgtcaggtcaattccggtaacggacgagacctgcacctgtaactagtggcagttgtctttcgatcggcgaggc  
gtcgtgggcatggaacttctaggggcaactctatggctgggaagtgtatgtagtagtctggagaggcagctgtcccaatata  
atcttctagagggtacttccagctctaagttggaggaagttcgaggcaataacaggtctgtgatgcccttagatatcttgggccgc  
acgctgtctacaatgtaggcgctaataagaatttatccccggcaccgccaagtgtccggtaatc-  
cacaatcacctgcgtgattgggattgggtcactgtaactgtgaccatcaacgaggaattccttgatgcgcgggtcactatccgcg  
gcagaatctgtccctgccctttgtacacaccgcccgtcgtcctaccgatcgaacggtaaggtaaagtggacagagaggagct  
gaaagtccattgaacgtcg-ttagaggaag

>AM168091.1\_Cavenderia\_parvispora\_OS126

catgcatgtctaagtataagccctagtagcggtgactgcagacggctcattacaacggttcagcttacagagcatgtcgcaa  
gaccttctggataaccgcagtaaatcggggctaatacatatacaaacggagggggcgagcgggcaaccgcgaagcttctgcga  
tggacacttagctattcgactgacccctcacgggaatggttgaaccggttcatattgctaactcgactgtggttgcctcaagtct  
gataagctataggcaaccgccctatcaacttgatggtaaggattggcttaccatggttgaacgggtaacgggggaatcaggggt  
tcgattccggagaggacgctgagaaacggcgtccacatctacgggtggcagcaggcgctaaattgccaatctcaataga  
gaggaggcggtgacaataaatcccgatggccatgggggcaaccccgggccaatcagaataagtacacattaaataccctaac  
caatataattggagggcaagtctggtgccagcagccggttaattccagctccaatagcgtataactaatgttgttcagttcgtc  
gtagctgaattgatggcaattcagcggt-

aagcaggtaggtagtcgtgtgtaggcgtcaggcgatcgactgtgcataaaccttgatgctcaaggtaaagactctagtcaaag  
atacgcagtgcatggcattgtggaacaaggcgatccgtagcttgggtggtgagctacgggtgcaatgattaataggaggag  
cggggggccttcatattgccgggcgagaggtgaaattcgttgacctggcaagatgtcctacagcgaagcattggccaagtgc  
ctctccattagtcaagaacgaaagtttggggatcaaagacgatcagataccgtcgtagtccaaaccataaactatgtcgaccagc  
gattaggttcgccaccttcttcgagagcaacctggcagcttgtgggaaccatgagttcttgactctggggggagtatggtcg  
caaggctgaaactaaaggaattgacggaagggcacaccatggagtgagcctgcggttaattgactcaacacgggaaa  
gcttaccagctcagatatgataaggattgacagacaaaagatctttcatgatctcataagtgggtggtgcatggccgttcttagtt  
gggtgagtgattgtcaggtcaattccggtaacggacgagacctgcacctgtaactagtagcagttgtctttcgtcggcgag  
gcgttttggcggtggaacttgaggggcaactctatcttgggaaacgagcgtagtagtctggagaggcagctgttccaaaat  
aatcttctagaggtacttccagctctaagttggaagaagtccgaggcaataacaggtctgtgatgcccttaatatcttgggccg  
cacgcgtgctacaatgtaggcgctaatgagtcaatat--ccggcaccgcaagggtgtctggtaatc-

cccaatcccctgcgtgattgggattgggtcactgtaactgtgaccatcaacgaggaattccttgatgcgcgggtcactatccgcg  
cagaatctgtccctgccctttgtacacaccgcccgtcgtcctaccgatcgaacggtaaggtaaagtggacggaggatggctgg  
aagtccattgaacgtcgttagaggaag

>HQ141521.1\_Cavenderia\_amphispora\_BM9A

catgcatgtctaagtataagccctagtagcggtgactgcagacggctcattacaacggttcagcttacagagcatgtcgcaa  
gaccttctggataaccgcagtaaatcggggctaatacatatacaaacggagggggcgagcgggcaaccgcgaagcttctgcga  
tggacacttagctattcgactgacccctcacgggaatggttgaaccggttcatattgctaactcgactgtggttggc-  
caagtctgataagctataaggcaaccgccctatcaacttgatggtaaggattggcttaccatggttgaacgggtaacggggaat  
caggggttcgattccggagaggacgcctgagaaacggcgtccacatctacgggtggcagcaggcgctaaattgccaatctc  
aatagagaggaggcggtgacaataaatcccgatggccatgggggcaaccccgggccaatcagaataagtacacattaaata  
ccctaaccaatataattggagggcaagtctggtgccagcagccggttaattccagctccaatagcgtataactaatgttgttga  
gttcgctcgtagctgaattgatggcaattcagcggt-

aagcaggtaggtagtcgtgtgtaggcgtcaggcgatcgactgtgcataaaccttgatgctcaaggtaaagactctagtcaaag

atacgcagtgcatggcattgtggaacaaggcgatccgtagcttggttggtgagctacgggtgcaatgattaatagggaggag  
cgggggccttcatattgccgggcgagaggtgaaattcggtgaccctggcaagatgtcctacagcgaaagcattggccaagtgc  
ctctccattagtgcaagaacgaaagtttggggatcaaagacgatcagataccgtagtccaaaccataaactatgtcgaccagc  
gattaggttcgccaccttcttcgagagcaacctggcagcttggtggaaaccatgagttcttgactctggggggagtatggtcg  
caaggctgaaacttaaaggaattgacggaagggcacacatggagtggagcctgcggcttaattgactcaacacgggaaa  
gcttaccaagctcagatatgataaggattgacagaccaaagatcttcatgatctcataagtggtggtgcatggcgttcttagtt  
ggtggagtgattgtcaggtcaattccggtaacggacgagacctgacctgctaactagtggcagttgtctttcgctcggcgag  
gcgttttggcggtggaactttgaggggcaactctatcttgggaagcgagc-

tagtagtctggagaggcagctgtcccaaaaataatcttctagaggtagtccagctctaagttggaggaagtcgagggaata  
acaggctctgtgatgcccttagatatcttgggcccgcgcgtgtacaatgtaggcgctaatagtagtcaatat -  
cccggcaccgccaagtgtctggtaatc-

cccaatcccctgcgtgattgggattggtcactgtaactgtgaccatcaacgaggaattccttgatgcgcgggtcactatcccgcg  
cagaatctgtccctgccctttgtacacaccgcccgcgtcctaccgatcgaacggtaaggtaaagtggacggaggatggctgg  
aagtccattgaacgtcg - ttagaggaag

>AM168090.1\_Cavenderia\_microspora\_TNS\_C\_38

catgcatgtctaagtataagccctagtagcggtagactgcagacggctcattacaacggttgacgcttacagagcatgtcgaa  
gaccttctggataaccgcagtaaactcggggctaatacatacaaacggagggggcgagcgggcaaccgcaagcttctgcga  
tggaacttagctattcgactgacccctcacgggaatggttgaacgggttcatattgctaactcgactgtggcttgccctcaagtct  
gataagctataggcaaccgccctatcaacttgatggttaaggattggttaccatggttgaacgggtaacgggggaatcagggg  
tcgattccggagaggacgctgagaaacggcgctccacatctacgggtggcagcaggcgcgtaaatgccaatctcaataga  
gaggagggcggtgacaataaatcccgatggccatgggggcaaccccgggccaatcagaataagtacacattaaataccctaac  
caatataattggagggcaagtctggtgccagcagccgcggttaattccagctccaatagcgtataactaatgttgtgacgttcgctc  
gtagctgaattgatggcaattcagcggt - aagcaggtaggtagtcg - gtgtag -

cgtagggcgatcgactgtgcataaaccttgatgtcgaaggtaagattctagtcaaagatacgcagtgcatggcattgtggaac  
aaggcgatccgtagcttggttggtgagctacgggtgcaatgattaataggaggagcggggccttcatattgccgggcgag  
aggtgaaattcggtgaccctggcaagatgtcctacagcgaaagcattggccaagtgccttccattagtcagaacgaaagtttg  
gggatcaaagacgatcagataccgtagtccaaaccataaactatgtcgaccagcgattaggttcgccaccttcttcgagag  
caacctggcagcttggtggaaaccatgagttcttgactctggggggagtatggtcgcaaggctgaaacttaaaggaattgac  
ggaagggcacacatggagtggagcctgcggcttaattgactcaacacgggaaagcttaccagctcagatatgataagga  
ttgacagaccaaagatcttcatgatctcataagtggtggtgcatggcgttcttagttggtggagtattgtcaggtcaattcc  
ggtaacggacgagacctgacctgctaactagtggcagttgtctttcgctcggcgaggcggtttggcggtggaactttgaggg  
gcaactctatctttgggaagcgagcgtagtagtctggagaggcagctgtcccaaaaataatcttctagaggtagtccagctct  
aagttggaggaagtcgagggaataacaggtctgtgatgcccttagatatcttgggcccgcgcgtgtacaatgtaggcgct  
aatgagtcaatat - - ccggcaccgcaagggtgtctggtaatc -

cccaatcccctgcgtgattgggattggtcactgtaactgtgaccatcaacgaggaattccttgatgcgcgggtcactatcccgcg  
cagaatctgtccctgccctttgtacacaccgcccgcgtcctaccgatcgaacggtaaggtaaagtggacggaggatggctgg  
aagtccattgaacgtcgtttagaggaag

>HQ141520.1\_Cavenderia\_boomerangispora\_K26B

catgcatgtctaagtataagcccttagtagcggtagactgcagacggctcattacaacggttgtagcttacagagcatgc - -  
gcaagccttctggataaccgcagtaaactcggggctaatacatacaaacggaggggtggagcggggcaaccgcaaagcttctg  
cgatggacacttagctattcgactaaccta - - cgggctcaggttgaacgggttcatattgccaatcgactatggcttgcca -  
tagtctgataagctatagacaaccgccctatcaacttgatggttaaggattggcttaccatggttgaacgggtaacgggggaatc  
aggggtcgattccggagaggacgcttgagaaacggcgctccacatctacgggtggcagcaggcgcgtaaatgtcccaatctca  
atagagaggaggcggcgacaataaatcccgatggctatgggggcaaccccgggccaatcagaataagtacacaataataac

cctaaccaatataattggagggcaagtctggtgccagcagccgcggaattccagctccaatagcatataactaacgttggtgcag  
ttcgctcgtagctgaattgatggcaattcagcgcc-  
aagcaagtaggtagtggagtaggggcttcaggcgatcgactgtgcataaaccttgatgctcaaggtaaagactctagtcaaag  
atacgagtgcatggcattgtggaacaaggcgatccgtagcttagttagtgggctgcgggtgcaatgattaataggaggag  
cgggggccttcatattgccgggagaggtgaaattcgttgaccctggcaagatgtcctacagcgaaagcattggccaagtgc  
ctctccattagtcaagaacgaaagtttggggatcaaagacgatcagataaccgtcgtagtccaaaccataaacgatgtcgaccag  
cgattaggttcgccaccttctcgagagcaacctggcagctgtgggaaacctgagttcttgactctggggggagatggtc  
gcaaggctgaaactaaaggaattgacggaagggcacaccatggagtgagcctgcggcttaattgactcaacacgggaa  
agcttaccaagctcagatatgataaggattgacagaccaatagatctttcatgatct-----  
-----  
-----  
-----  
-----  
-----  
-----

>AM168085.1\_Cavenderia\_exigua\_TNS\_C\_199

catgcatgtctaagtataagccctgtacggctagactgcagacggctcattacaacgggttagcttacagagcatgc--  
gcaagccttctggataaccgcagtaaatcggggctaatacatacaaacggaggggtggagcgggcaaccgcaaagcttctg  
cgatggacacttagctattcgactaacctt--cgggtcagggttgaaccgggtcatattgccaatcgactatggcttgcca-  
tagtctgataagctatagacaaccgccctatcaactgatggtaaggattggcttaccatggttgtaacgggtaacgggggaatc  
aggggtcgattccggagaggacgcctgagaaacggcgctccacatctacgggtggcagcaggcgcgtaaattgccaatctca  
atagagaggaggcggcgacaataatcccgatggctatgggggcaacccgggccaatcagaataagtacacaataataac  
cctaaccaatataattggagggcaggctctggtgccagcagccgcggaattccagctccaatagcatataactaacgttggtgcag  
ttcgctcgtagctgaattgatggcaattcagcgcc-  
aagcaagtaggtagtgtgagggcgatcgactgtgcataaaccttgatgcttaaggtaaagattctagtcaaag  
atacgagtgcatggcattgtggaacaaggcgatccgtagcttagttagtgggctgcgggtgcaatgattaataggaggag  
cgggggccttcatattgccgggagaggtgaaattcgttgaccctggcaagatgtcctacagcgaaagcattggccaagtgc  
ctctccattagtcaagaacgaaagtttggggatcaaagacgatcagataaccgtcgtagtcagaccataaacgatgtcgaccag  
cgattaggttcgccaccttctcgagagcaacctggcagctgtgggaaacctgagttcttgactctggggggagatggtc  
gcaaggctgaaactaaaggaattgacggaagggcacaccatggagtgagcctgcggcttaattgactcaacacgggaa  
agcttaccaagctcagatatgataaggattgacagaccaatagatctttcatgatctcataagtgggtggtgcatggccgttcttagt  
tggtggagtgattgtcagggtcaattccggtaacggacgagacctcgactgtaactagtggcagttgtcttttcgctcggcga  
ggcgctcattggcatacgactttgaggggcaactctatcttggaagtgtgagcgtagtagtctggagaggcagctgtcccctaatt  
aatcttctagaggtacttcagctctaagctggaggaagtccgaggcaataacagggtctgtgatgcccttagatatcttgggcc  
gcacgcgtgtacaatgtaggcgctaataatgatattac--ccggcaccgtcaagggtgcggaatc-  
tccaatcacctgcgtgattgggcttggtcactgtaactgtgaccattaacgaggaattcctgtatcgcgagtcactatctcgcat  
agaatctgtccctgccctttgtacacaccgccgctcctaccgatcgaacggtaaggtaaagtggacagacggtagctgga  
agtccattgaactcgttttagaggaag

>AM168030.1\_Dictyostelium\_brefeldianum\_TNS\_C\_115

catgcatgtctaagtataaattctgtacgatgaaactgcagacggctcattacaacagtataaactgctagactgttttta-  
accttttgataaccgcagtaaatcggggctaatacatagaagcgatggg-----  
cgactggtaacggaagctcagcgatta----  
ttagcataactaccaataccttcgggtcttggtgaaacccaataatattgcagatcgaa-----

gatttatcttcgacaagtaatgtgtcactgccctatcaacttgatggtagcgtattggcctaccatggttgtaacgggtaacgggg  
aattaggggttcgattccggagagggagcctgagaaatggctaccactttacggaaggcagcagggcgcgcaaattactcaatc  
ccaata-cggggaagtagtgacaataaatacaatacctat---  
ccttaatggagggcaattgaaatgaacacaaatataaactcttaattaacacaattggagggcaagtctggtgccagcagccgc  
ggtaattccagctccaatagcatatactaaagtgtgtcagttagctcgtagttgaatattgggtcaagctaattgctcaattgttcag  
ctgtttcaactttgcgtttggacatttactgtgagaaaattgtggtgtttaaagcaggcg--  
tctcgctgatctttgcagcatggtatgatgaaacatgacattttgcgctattggtt-  
tgcgctaaagtgaatgattaatagggatggatgggggtgttcatattggtgggcgagaggtgaaattcggtgaccctatcaa  
gatgaacttctgcgaaagcattcaccaaatacttctcattaatcaagaacgaaagtttggggatcgaagacgatcagataccgt  
cgtagtccaaactataaactatgtcgaccagggatcggttaa---  
aatttttttaaaatgaatcggcacctgtgagaaatcacgagtggttagattccggggggagtaggtcgcaagtctgaaacttaa  
aggaattgacggaagggcacacaatggagtggagcctgcggcttaatttgactcaactcgggaaaacttaccaagctaagat  
atagttaggattgacagactaaaagatctttcatgattctataagtgggtggtcatggtcggttcttagttggtggagcgattgtct  
ggtcaattccgataacggacgagacctcgacctgctaactagtagtatttattagtaaatgggcgatagcttttctggatttaga  
gcgatcgggtcg-tttctggtcaaggagtgtg-----  
tagtctgacttgataggtagcaattaaaaaacttcttagagggactacctgcctcaagcaggcggaagtcagggaataaca  
ggctctgtgatgcccttagataccttgggccgcacgcgcgtacaatgtataaaacaaaaagggt-----  
tcctggccggaaggattgggtaataatgaattttctacgtaactgggattgatctttgtaattatgatcataaacgaggaattcc  
ttgtaagcgtaggctattaccctatgctgaatgtgcccttgcctttgtacacaccgcccgtcgctcctaccgatcgaatgatacgg  
aaagttaacggatataaataaaagtatttaaacattgtttagaggaag  
>HQ141482.1\_Dictyostelium\_mucoroides\_sweden\_20  
catgcatgtctaagtataaattctgtacgatgaaactgcagacggctcattacaacagtataaactgctagactgttttta-  
accttttgataaccgcagtaaatcggggctaatacatagaagcgatggg-----  
cgactggtaacggaagctcagcgatta----  
ttagcataactaccaataccttcgggtcttgggtgaaacccaataatattgcagatcgaa-----  
gatttatcttcgacaagtaatgtgtcactgccctatcaacttgatggtagcgtattggcctaccatggttgtaacgggtaacgggg  
aattaggggttcgattccggagagggagcctgagaaatggctaccactttacggaaggcagcagggcgcgcaaattactcaatc  
ccaata-cggggaagtagtgacaataaatacaatacctat---  
ccttaatggagggcaattgaaatgaacacaaatataaactcttaattaacacaattggagggcaagtctggtgccagcagccgc  
ggtaattccagctccaatagcatatactaaagtgtgtcagttagctcgtagttgaatattgggtcaagctaattgctcaattgttcag  
ctgtttcaactttgcgtttggacatttactgtgagaaaattgtggtgtttaaagcaggcg--  
tctcgctgatctttgcagcatggtatgatgaaacatgacattttgcgctattggtt-  
tgcgctaaagtgaatgattaatagggatggatgggggtgttcatattggtgggcgagaggtgaaattcggtgaccctatcaa  
gatgaacttctgcgaaagcattcaccaaatacttctcattaatcaagaacgaaagtttggggatcgaagacgatcagataccgt  
cgtagtccaaactataaactatgtcgaccagggatcggttaa---  
aatttttttaaaatgaatcggcacctgtgagaaatcacgagtggttagattccggggggagtaggtcgcaagtctgaaacttaa  
aggaattgacggaagggcacacaatggagtggagcctgcggcttaatttgactcaactcgggaaaacttaccaagctaagat  
atagttaggattgacagactaaaagatctttcatgattctataagtgggtggtcatggtcggttcttagttggtggagcgattgtct  
ggtcaattccgataacggacgagacctcgacctgctaactagtagtatttattagtaaatgggcgatagcttttctggatttaga  
gcgatcgggtcg-tttctggtcaaggagtgtg-----  
tagtctgacttgataggtagcaattaaaaaacttcttagagggactacctgcctcaagcaggcggaagtcagggaataaca  
ggctctgtgatgcccttagataccttgggccgcacgcgcgtacaatgtataaaacaaaaagggt-----  
tcctggccggaaggattgggtaataatgaattttctacgtaactgggattgatctttgtaattatgatcataaacgaggaattcc  
ttgtaagcgtaggctattaccctatgctgaatgtgcccttgcctttgtacacaccgcccgtcgctcctaccgatcgaatgatacgg

aaagttaacggatataaattaaaaagttatttaaacattgtttagaggaag  
>AM168049.1\_Dictyostelium\_macrocephalum\_B33  
catgcatgtctaagtataaattcttgtacgatgaaactgcagacggctcattacaacagtataaactaatagactgttttta-  
accttttgataaccgcagtaaatcggggctaatacatacaagcgatggg-----  
tgactggcaacggaagctcagcgatta----  
ttagcattactaccaataccttcgggtcttgggtgaaaccgaataatattgcagatcgag-----  
gatttatcttcgacaagtactgtgtcactgccctatcaacttgatggtacggtattggcctaccatggttgtaacgggtaacgggg  
aattaggggtcgattccggagagggagcctgagaaatggctaccacttctacggaaggcagcaggcgcgaaattactcaatc  
ccaata-cggggaagtagtgacaataaatatcaatacctat---  
ccttaacggagggcaattgaaatgaacacaaattaaaaactcttaattaacacaattggaggggcaagtctggtgccagcagccgc  
ggtaattccagctccaatagcatatactaaagttgttgacgttagctcgtagttgaatactgggctaagttacaactcaatagctct  
gcttctgcatctttgtttgggcatttcactgtgagaaaattgtggtgtttaagcaggcg--  
tctcgctgatctttgcagcatggtatgatgaaacatgacattttacgctattggtt-  
tgcgtctaaagtgaatgattaatagggatggatgggggtgttcatattggtgggagagaggtgaaattcgttgaccctatcaa  
gatgaacttctgcgaaagcattcaccaaatactccccattaatcaagaacgaaagtttggggatcgaagacgatcagataccgt  
cgtagtccaaactataaactatgtcgaccagggatcggtcaa---  
aattttttaaaatttgatcggcaccttgtgagaaatcatgagtgttagattccggggggagtagtggtcgcaagtctgaaacttaa  
aggaattgacggaagggcacacaatggagtgagcctgcggcttaattgactcaactcgggaaaacttaccagctaagat  
atagtaaggattgacagactaaaagatctttcatgattctataagtggtggtgcatggtcgttcttagttggtggagcgatttgc  
ggtaattccgataacggacgagacctcgacctgctaactagtagtatttattagccgaatgggagatagcttctctgggttggga  
atgatcgggtca-tctctattcaaggagtgtg----tagtctggttgataggtacgaa-  
ttaaaaaacttcttagagggactacctgcctcaagcaggcggaagtcagggaataacagggtctgtgatgcccttagatacctt  
gggccgcacgcgcgctacaatgtagaaaacaaaaaggc-----  
tcctggtccggaaggattgggtaatcatttgaattttctacgtaactgggattgatcttgaattatgatcatcaacgaggaattcct  
tgtaagcgcaggtcattaccctgtgctgaatatgtccctgccctttgtacacaccgcccgtcgtcctaccgatcgaatgatacgg  
aaagttaacagataaaactaaaagtatttaaacattgtttagaggaag  
>AM168050.1\_Dictyostelium\_medium\_TNS\_C\_205  
catgcatgtctaagtataaattcttgtacgatgaaactgcagacggctcattacaacagtataaactaatagactgttttta-  
accttttgataaccgcagtaaatcggggctaatacatagaagcgatggg-----tgac-ggcaac-  
gaagctcagcgatta---ttagcattactaccaataccttcgggtcttgggtgaaaccgaataatattgcagatcgag-----  
--  
gatttatcttcgacaagtactgtgtcactgccctatcaacttgatggtacggtattggcctaccatggttgtaacgggtaacgggg  
aattaggggtcgattccggagagggagcctgagaaatggctaccacttctacggaaggcagcaggcgcgaaattactcaatc  
ccaata-cggggaagtagtgacaataaatatcaatacctat---  
ccttaatggagggcaattgaaatgaacacaaattaaaaactcttaattaacacaattggaggggcaagtctggtgccagcagccgc  
ggtaattccagctccaatagcatatactaaagttgttgacgttagctcgtagttgaatactgggctaagttacaactcaatagttca  
gcttgttcaacctagcgtttggacatttcactgtgagaaaattgtggtgtttaagcaggcg--  
tctcgctgatctttgcagcatggtatgatggaacatgacattttgcgctattggtt-  
tgcgtctaaagtgaatgattaatagggatggatgggggtgttcatattggtgggagagaggtgaaattcgttgaccctatcaa  
gatgaacttctgcgaaagcattcaccaaatactccccattaatcaagaacgaaagtttggggatcgaagacgatcagataccgt  
cgtagtccaaactataaactatgtcgaccagggatcggttaa---  
aattttttaaaattaatcggcaccttgtgagaaatcacgagtgttagattccggggggagtagtggtcgcaagtctgaaacttaa  
aggaattgacggaagggcacacaatggagtgagcctgcggcttaattgactcaactcgggaaaacttaccagctaagat  
atagtaaggattgacagactaaaagatctttcatgattctataagtggtggtgcatggtcgttcttagttggtggagcgatttgc

gggtcaattccgataacggacgagacctcgacctgctaactagtagtatttattagtcgaataggcgatagcttttctgggtttgga  
atgatcgggtca-tctcctattcaaggagtgtg-----tagtctggcttgataggtacgaa-  
ttaaaaaacttcttagaggggactacctgcctcaagcaggcggaagtcgagggaataacagggtctgtgatgcccttagataacctt  
gggccgcacgcgcgtacaatgtagaaaaaaaaaggc-----  
tcctggccggaaggattgggtaatcatttgaattttctacgtaactgggattgatctttgtaattatgatcatcaacgaggaattcct  
tgtaagcgcaggtcattacctgtgctgaatatgtccctgcccctttgtacacaccgcccgtcgctcctaccgatcgaatgatacgggt  
aaagttaacggatataaactaaaagttatttaaacattgttttagaggaag  
>MN338956.1\_Cavenderia\_canoespora\_Mad14\_3C

-----  
tataagctctgtacggctagactgcagacggctcattacaacgggtgtatcttacagggcatgtcgcaagaccttctggataacc  
gcagtaaatcggggctaatacatataaacggagggatggagagggcaaccttgaagtttctgcgatggacatttagctattcg  
accaaccccgcaagggaacgggttgaaccgggtcatattgctaactcgactctagcttgctagtagtctgatgagctatagacaac  
cgccctatcaacttgatggtaaggtttggcttaccatgggtgtaacgggtaacggggaatcaggggtcgattccggagaggac  
gcctgagaaacggcgctccacatctacgggtggcagcaggcgctaaattgcccaatctcaacagagaggaggcggtgacaa  
taaatcccgatggctttgggggaacccaggccaatcagaataagtacacattaaatcccttaaccaatataattggaggggca  
agtctgggtccagcagccggttaattccagctccaatagcatataactaattgtgttcagttcgctcgtagctgaattttgagcta  
tatcgcggtcaacactgtaggtgattattggtagtaatatcataatcgactgtgcataaaccttgatgctcaaggtaggcctttat  
agggtagatacacagtgcatggcattgtggaacaaggcatctcgcggttagttggtggccgcgggggcaatgattaatag  
ggaggagcgggggccttcatattgcagggcgagaggtgaaattcggtgacccttgcaagatgtccgacagcgaaagcattg  
gccaaagtcctctccattagtcagaacgaaagtttggggatcaaagacgatcagataaccgtcgtagtccaaaccataaactat  
gtcgaccagcgattagggcggttaccttctcgagagctgcctagcagcttggtggaaccatgagtgcttgactctggggg  
gagtatggtcgcaaggctgaaactaaaggaattgacggaagggcacaccatggagtggagcctgcggttaatttgactca  
acacgggaaagcttaccaagctcagatatgataaggattgacagactaaaagatctttcatgatctcataagtggtggtgatg  
gtcgttcttagttggtggagtattgtcaggtcaattccggtaacggacgagacctcgacctgtaactagtggttattcttctt  
cgattgacgagggcggtattgctttgattatgaggggcaacctttatagtcgggtaatattttagtagtctggaggagtgggtt  
cagataattaatcttctagaggtacttctggtctaagccagaggaagtcgagggaataacagggtctgtgatgcccttagatat  
cttggggccgcacgcgtgtacaatgtaggcgtaatgagtcacaatttcagctccgtaaggagtctggttaatttggaatcacc  
tgctgattgggcttgactactgtaactgtggtcatcaacgaggaattccttgatgcgcgagtcactatctcgcgagaatctgtg  
cctgccctttgtacacaccgcccgtcgctcctaccgatcgaacgatcaggtaaagtggacagaggatctttagaagtcca----

-----  
>MN338955.1\_Cavenderia\_basinodulosa\_Mad5\_1A  
catgcatgtctaagtaagctcttgctactgttatgactgcagacggctcattatcatatctgtatcttacagggcatgtcgcaagacc  
ttctggataaccgcagtaaatcggggctaatacatataaacggagggatggagagggctaccttgaagtttctgcgatggaca  
tttagctattcgacctccccgcaagggaacgggttgaaccgggtcatattgctaactcgactctagcttgctagtttctgatgagct  
atagacaaccgccctatcaacttgatggtaagggtttggcttaccttggttgatcgggtaacggggaatcaggggtcgattccgg  
agaggacgcctgacaaacggcgctccacatctacgggtggcagcaggcgctaaattgcccaatctcaacagagaggaggc  
gggtgacaataaatcccgatggctttgggggcaacccaggccaatcagaataagtacacattaaatcccttaaccaatataattg  
gagggcaagtctggtgccagcagccggttaattccagctccaatagcatataactaattgttgcagttcgctcgtagctgaat  
tttagctatatcgcggtcaacactgtaggtgattattggtagtaatatcataatcgactgtgcataaaccttgatgctcaaggta  
ggcctttatagggtagatacacagtgcatggcattgtggaacaaggcatctcgcggttagttggtgggcccgcgggggcaat  
gattaataggaggagcgggggccttcatattgcagggcgagaggtgaaattcggtgacccttgcaagatgtccgacagcga  
aagcattggccaagtgcctctcattagtcagaacgaaagtttggggatcaaagacgatcagataaccgtcgtagtccaaacca  
taaactatgtcgaccagcgattagggcggttaccttctcgagagctgcctagcagcttggtggaaccatgagtgcttgactc  
tggggggagtatggtcgcaaggctgaaacttaaaggaattgacggaagggcacaccatggagtggagcctgcggttaattt

gactcaacacgaggaaagcttaccaagctcagatatgataaggattgacagactaaaagatctttcatgatctcataagtggtggt  
gcatggctgttcttagttggtggagtgattgtcagggtcaattccggtaacggacgagacctcgacctgtaactagtggtgattc  
attcttcgattgacgagggcggttattgctttgattatgaggggcaacctttatagtcgggtaataattttagtagtctggaggagt  
gggtttcagataattaattctcctagaggtacttctggcttaagccagaggaaagtcgagggaataacaggtctgtgatgccctt  
agatatcttgggcccgcgcgtgctacaatgtaggcgctaagtgtcacaatttcagctccgtaaggagcttggaatcttgga  
atcacctgcgtgattgggcttgactactgtaactgtggtcatcaacgaggaattccttgatgcgcgagtcactatctgcgcgaga  
atctgtccctgccctttgtacacaccgcccgtcgtcctaccgatcgaacgatcaggtaaaatggacattagtcctcccgatgtaat  
acggt-----

>MH745571.1\_Cavenderia\_aureostabilis\_TH10B

----

catgtctaagtataagctctgtacggctagactgcagacggctcattacaacggttgtatcttccaggacatgtcgcaagatcttc  
tgataaccgcagtaaatcggggctaatacatatacaaacgaaggggtggagagggcaaccttgaaagcttctcgatggacact  
tagctattcgaccaaccccgaagggtggttgaacgggttcatattgctaactcgactctggcttgccatgagtc-  
gataagctatagacaaccgccctatcaactgtatggttaaggtttggcttaccatggttgaacgggtaacggggaatcagggtt  
cgattccggagaggacgcctgagaaacggcgctccacatctacgggtggcagcaggcgcgtaattgccaatctcaacaga  
gaggagggcggtgacaataaatcccgatggctttgggggcaacccaggctaatacagaataagtacacattaaatcccttaacc  
aatataattggagggcaagtctggtgccagcagccggttaattccagctccaatagcatataactaatgttgttcagttcgctc  
gtagcttaattttgagctattacgcggctcaacactgtaggtcatgcttagcaataagttcataatcgactgtgcataaaccttgatg  
ctcaaggtaggcctttatagggtagatacacagtgcatggcattgtggaacaaggcatctcgcggttagttggtgggcccgcg  
ggggcaatgattaataggagagcgggggccttcatattgcagggcgagaggtgaaattcgttgacccttgcaagatgtcc  
gacagcgaagcattggccaagtgcctcccattagtcagaacgaaagtttgggatcaaagacgatcagataaccgtcgtag  
tcaaaccataaactatgtcgaccagcgattaggcggttaccttctcgagagctgcctagcagcttgtgggaaccatgagt  
gcttgactctgggggagtatggtcgcaagggtgaaacttaaggaattgacggaagggcacaccatggagtgagcctg  
cggcttaatttgactcaacacgggaaagcttaccaagctcagatatgataaggattgacagactaaaagatctttcatgatctcat  
aagtgggtggtcatggtcgttcttagttggtggagtgattgtcagggtcaattccggtaacggacgagacctcgacctgctaact  
agtggtgattcattccttcgctcgacgagggcggtctgctttattatgaggg--

caacttcagtagagggtagggtctgtattagctctgggggagtggtttcaaaaatttaattcttcttagaggtacttctggcttaag  
ccagaggaagttcgaggcaataacagggtctgtgatgcccttagatatcttgggcccgcgcgtgctacaatgtaggcgctaagt  
agtcaatacatccagctccgtaaggagtctggaatcttggaaatccctgcgtgattgggcttgactactgtaactgtggtcatca  
acgaggaattccttgatgcgcgagtcactatctcgcgagaatctgtccctgccctttgtacacaccgcccgtcgtcctaccgat  
cgaacgatcaggtaaaagtgacagaggcatttgaaagtcattgaacgccgttttagaggaag

>MH745572.1\_Cavenderia\_protodigitata\_TH18BA

cctgcatgtctaagtataagctctgtacggctagactgcagacggctcattacaacggttgtatcttccagggtcatgtcgcaaga  
ccttctggataaccgcagtaaatcggggctaatacatatacaaacggagggatggagagggcaaccttgaaagttctcgatgga  
caattagtattcgaccaaccccgaagggaatggttgaacgggttcatattgctaactcgactctagcttgtagtagtctgataa  
gctatagacaaccgccctatcaactgtatggtaaggtttggcttaccatggttgaacgggtaacggggaatcagggttcgatt  
ccggagaggacgcctgagaaacggcgctccacatctacgggtggcagcaggcgcgtaattgccaatctcaacagagagg  
aggcggtgacaataaatcccgatggctttgggggcaacccaggctaatacagaataagtacacattaaatcccttaaccaatat  
aattggagggcaagtctggtgccagcagccggttaattccagctccaatagcatataactaatgttgttcagttcgctcgtagc  
ttaattttgagctatatcgcggtcaacactgtaggtcatggctagcaatagttgcataatcgactgtgcataaaccttgatgtca  
aggtaggcctttatagggtagatacacagtgcatggcattgtggaacaaggcatctcgcggttagttggtgggcccgcgggg  
gcaatgattaataggagagcgggggccttcatattgcagggcgagaggtgaaattcgttgacccttgcaagatgtcctaca  
gcgaaagcattggccaagtgcctcccattagtcagaacgaaagtttggggatcaaagacgatcagataaccgtcgtagtcca  
aaccataaactatgtcgaccagcgattaggcggttaccttctcgagagctgcctagcagcttgtgggaaaccatgagtgctt



ggactctgggggggagtatggtcgcaaggctgaaacttaaaggaattgacggaagggcacaccatggagtgagcctgcgg  
cttaatttgactcaacacgggaaagcttaccagctcagatatgattaggattgacagactaaaagatcttcatgatctcataagt  
ggtggtgcatggtcggttcttagttggtggagtgattgtcagggtcaattccggtaacggacgagacctcgacctgtaactagt  
ggattcattcttcgattgacgaggcaggtcttgcttgattatagggggcaacttctatagtcgggtacggttttagtagtctgg  
aggagtggatttcaaaaaattaatcttctagaggtacttctggcttaagccagaggaagtcgagggaataacagggtctgtg  
atgcccttagatatcttgggccgcacgcgtgctacaatgtaggcgtaatgagttttacatccatctccgaaggagtatggtaa  
tcttggaatcacctgcgtgattgggcttgaccactgtaactgtggtcatcaacgaggaattccttgatgcgcgagtcactatctcg  
cgcagaatctgtccctgccctttgtacacaccgcccgtcgtcctaccgatcgaacgatcaggtaaagtggacagaggggtcttg  
gaagtcattgaacgccg - ttagaggaag

>KF662214.1\_Cavenderia\_aureostipes\_var.\_helvetia\_HM592

-----  
tgtatcttacagggcatgtcgcaagaccttctggataaccgcagtaaatacggggctaatacatataaaacggaggaatggaggg  
ggcaaccttgaagtttctgcatggacatttagctattcgaccaaccccgcaaggggaatggttgaacgggttcattatgctaatac  
gactctagcttgctagtagtctgataagctatagacaaccgcccctatcaacttgatggttaaggttttggcttaccatggttgtaacg  
ggtaacgggggaatcaggggtcgattccggagaggacgcctgagaaacggcgctccacatctacgggtggcagcagggcgct  
aaattgcccaatctcaacagagaggaggcggtgacaataatcccgatggctttgggggcaacccagggtaatcagaataa  
gtacacattaaatcccctaaccaatataattggaggggaagctggtgccagcagccggttaattccagctccaatagcatata  
ctaattgttgtgcagttcgctcgtagctgaattttgagctatatcgcggtcaacactgtaggtcatcgttggtagtgtgcataat  
cgactgtgcataaaccttgatgctcaaggtaggcctttatagggtagatacacagtgcattggtgaacaaggcatctcgc  
ggcttagttggtggggccgggggcaatgattaataggaggagcgggggccttcattatgcagggcgagaggtgaaattc  
gttgaccttgcaagatgtcctacagcgaagcattggccaagtgcctccccattagtcaagaacgaaagtttggggatcaaag  
acgatcagataccgctgtagtccaaaccataaactatgtcgaccagcgattaggcgggtaccttcttcgagagctgcctagca  
gcttggtggaaacatgagtgcttgactctggggggagtatggtcgcaaggctgaaacttaaaggaattgacggaagggc  
acaccatggagtggaagcctgcggcttaattgactcaacacgggaaagcttaccagctcagatatgataaggattgacagact  
aaaagatcttcatgatctcataagtgggtggtgcatggtcggttcttagttggtggagtgattgtcagggtcaattccggtaacggac  
gagacctcgacctgtaactagtggttattccttcgctcgacgaggcaggcttgccttgattatagggggcaacctttatagt  
cgggtaaggtttgtattagtctgggggagtggtttcatataattaatcttcttagaggtacttctggcttaagccagaggaagt  
ccgagggaataacagggtctgtgatgcccttagatatcttggccgcacgcgtgctacaatgtaggcgtaatgagtcatttatcc  
agctccgtaaggagctggtaatcttggaatcccctgcgtgattgggcttgaccactgtaactgtggtcatcaacgaggaattcct  
tgtatgcgcgagtcactatctcgcgcagaatctgtccctgccctttgtacacaccgcccgtcgtcctaccgatcgaacgatcagg  
taaagtggacagagagttt-----

>KF662201.1\_Cavenderia\_aureostipes\_OH396

-----  
tgtatcttcagggcatgtcgcaagaccttctggataaccgcagtaaatacggggctaatacatataaaacggagggatggagag  
ggcaaccttgaagtttctgcatggacaattagttattcgaccaaccccgcaaggggaatggttgaacgggttcattatgctaatac  
gactctagcttgctagtagtctgataagctatagacaaccgcccctatcaacttgatggttaaggttttggcttaccatggttgtaacg  
ggtaacgggggaatcaggggtcgattccggagaggacgcctgagaaacggcgctccacatctacgggtggcagcagggcgct  
aaattgcccaatctcaacagagaggaggcggtgacaataatcccgatggctttgggggcaacccagggtaatcagaataa  
gtacacattaaatcccctaaccaatataattggaggggaagctggtgccagcagccggttaattccagctccaatagcatata  
ctaattgttgtgcagttcgctcgtagctgaattttgagctatatcgcggtcaacactgtaggtcatggtagcaatagttgcataat  
cgactgtgcataaaccttgatgctcaaggtaggcctttatagggtagatacacagtgcattggtgaacaaggcatctcgc  
ggcttagttggtggggccgggggcaatgattaataggaggagcgggggccttcattatgcagggcgagaggtgaaattc  
gttgaccttgcaagatgtcctacagcgaagcattggccaagtgcctccccattagtcaagaacgaaagtttggggatcaaag  
acgatcagataccgctgtagtccaaaccataaactatgtcgaccagcgattaggcgggtaccttcttcgagagctgcctagca

gcttgtgggaaaccatgagtgcttggactctggggggagtatggtcgcaaggctgaaacttaaaggaattgacggaagggc  
acaccatggagtgagcctgcggttaattgactcaacacgggaaagcttaccaagctcagatatgattaggattgacagact  
aaaagatctttcatgatctcataagtggtggtcatggtcggttcttagttggtggagtgattgtcaggtcaattccggtaacggac  
gagacctgacctgctaactagtggtgattcattcttcgattgacgaggcaggtcttgcttgattatagggggcaacttctatagt  
cgggtagggtttgtagtagtctggaggagtggttcaaaaaattaatcttcttagaggtacttctggctctaagccagaggaag  
tccgagggaataacaggtctgtgatgcccttagatatcttgggcccgcacgcgtgctacaatgtaggcgtaatgagttttacatc  
catctccgaaggagtatggaatcttggaatcacctgcgtgattgggcttgaccactgtaactgtggtcatcaacgaggaattcc  
ttgatgcgcgagtcactatctcgcgcagaatctgtccctgccctttgtacacaccgcccgtcgtcctaccgatcgaacgatcag  
gtaaagtggacagaggggtacttg-----

>KF662199.1\_Cavenderia\_aureostipes\_B15A

-

atgcatgtctaagtataagctcttgtacggctagactgcagacggctcattacaacggttgatatctccagggcatgtcgcaagac  
cttctggataaccgcagtaaatcggggctaatacatataaacggagggatggagagggcaaccttgaagtttctgcgatggac  
aattagttattcgaccaaccccgcaagggaaacggttggaaccggttcattgctaactgactctagcttgctagtagtctgataa  
gctatagacaaccgccctatcaacttgatggttaaggttttggcttaccatggttgaacgggtaacggggaatcaggggtcgatt  
ccggagaggacgcctgagaaacggcgtccacatctacgggtggcagcaggcgctaaattgcccaatctcaacagagagg  
aggcggtgacaataaatcccgatggcttgggggcaacccaggctaatacagaataagtacacattaaatcccttaaccaatat  
aattggagggcaagtctggtgccagcagccgcggttaattccagctccaatagcatataactaatgttggttcagttcgctcgtagc  
ttaattttgagctatatcgccggtcaacactgtaggtcatggctagcaatagttgcataatcgactgtgcataaaccttgatgctca  
aggtaggcctttatagggtagatacacagtgcattgtggaacaaggcatctcgcggcttagttggtgggccgcgggg  
gcaatgattaataggagggagcgggggccttcatattgcagggcgagaggtgaaattcgttgacccttgcaagatgtcctaca  
gcgaaagcattggccaagtgcctcccattagtaagaacgaaagtttgggatcaaagacgatcagataccgtcgtagtcca  
aaccataaactatgtcgaccagcgattaggcgggtaccttctcgagagctgccttagcagcttggtgggaaaccatgagtgctt  
ggactctggggggagtatggtcgcaaggctgaaacttaaaggaattgacggaagggcacaccatggagtgagcctgcgg  
cttaatttgactcaacacgggaaagcttaccaagctcagatatgattaggattgacagactaaaagatctttcatgatctcataagt  
ggtggtgcatggtcggttcttagttggtggagtgattgtcaggtcaattccggtaacggacgagacctgcacctgctaactagt  
ggattcattcttcgattgacgaggcaggtcttgcttgattatagggggcaactttatagtcgggtacggtttgtagtagtctgg  
aggagtggatttcaaaaaattaatcttcttagaggtacttctggctctaagccagaggaagtcaggagggaataacaggtctgtg  
atgcccttagatatcttggccgcacgcgtgctacaatgtaggcgctaagagttttacatccatctccgcaaggagtatggtaa  
tcttggaatcacctgcgtgattgggcttgaccactgtaactgtggtcatcaacgaggaattccttgatgcgcgagtcactatctcg  
cgcagaatctgtccctgccctttgtacacaccgcccgtcgtcctaccgatcgaacgatcaggtaaaagtggacagagggcactt  
ggaagtccattgaacgcccg-ttagaggaag

>GQ496157.1\_Cavenderia\_fasciculoidea

catgcatgtctaagtataagctcttgtacggctagactgcagacggctcattacaacggttgatatcttaccagggcatgtcgcaaga  
ccttctggataaccgcagtaaatcggggctaatacatataaacggagggatggagagggtaaccttgaagtttctgcgatgga  
catttagctattcgaccaaccccgcaagggaaatggttggaaccggttcattgctaactgactctagcttgctagtagtctgataa  
gctatagacaaccgccctatcaacttgatggttaaggttttggcttaccatggttgaacgggtaacggggaatcaggggtcgatt  
ccggagaggacgcctgagaaacggcgtccacatctacgggtggcagcaggcgctaaattgcccaatctcaacagagagg  
aggcggtgacaataaatcccgatggcttgggggcaacccaggctaatacagaataagtacacattaaatcccttaaccaatat  
aattggagggcaagtctggtgccagcagccgcggttaattccagctccaatagcatataactaatgttggttcagttcgctcgtagc  
ttaattttgagctatatcgccggtcaacactgtaggtcatggctagcaatagttgcataatcgactgtgcataaaccttgatgctca  
aggtaggcctttatagggtagatacacagtgcattgtggaacaaggcatctcgcggcttagttggtgggccgcgggg  
gcaatgattaataggagggagcgggggccttcatattgcagggcgagaggtgaaattcgttgacccttgcaagatgtcctaca  
gcgaaagcattggccaagtgcctcccattagtaagaacgaaagtttgggatcaaagacgatcagataccgtcgtagtcca

aaccataaactatgtcgaccagcgattaggcgggctaccttctcgagagctgcctagcagcttggtgggaaaccatgagtgctt  
ggactctggggggagatggtcgcaaggctgaaacttaaaggaattgacggaagggcacaccatggagtgagcctgcgg  
cttaatttgactcaacacgggaaagcttaccagctcagatatgattaggattgacagactaaaagatctttcatgatctcataagt  
ggtggtgcatggtcggttcttagttggtggagtgatttgcagggtcaattccggtaacggacgagacctcgacctgctaactagt  
ggattcattcttcgattgacgaggcaggtattgctttgattatagggggcaactttatagtcgggtagtgcttgattagctggg  
agagtgggtttcaaataattaatcttcctagaggtagtctggctctaagccagaggaagtccgaggcaataacaggtctgtgat  
gcccttagatatcttgggcccgcacgcgtgctacaatgtaggcgctaagagttttacatccatctccgcaaggagtatgtaatct  
tggaaatcccctgctgattgggcttgaccactgtaactgtggtcatcaacgaggaattccttgatgcgcgagtcactatctcgcg  
cagaatctgtccctgccctttgtacacaccgccgctgctcctaccgatcgaacgatcaggtaaagtggacagaggggtgttggga  
agtccattgaacgccg-ttagaggaag

>OM677259.1\_Cavenderia\_ungulata\_TH18B

-----

aggataagctcttgtagcgctagactgcagacgggctcattacaacgggtgtatcttccagggcatgtcgcaagaccttctggata  
accgcagtaaatcggggctaatacatatacaaacggagggatggagagggcaacctgaagtttctgcgatggacaattagttat  
tcgaccaaccccgcaagggaatggttgaaccgggtcatattgctaactgactctagcttgctagtagtctgataagctatagac  
aaccgccctatcaactgatggaaggttttgcttaccatggttgaacgggtaacgggggaatcagggttcgattccggagag  
gacgctgagaaacggcgctccacatctacgggtggcagcaggcgctaaattgccaatctcaacagagaggagggcggtga  
caataaatcccgatggccttgggggcaacccagggctaatacagaataagtacacattaaatcccttaaccaatataattggaggg  
caagtctggtgccagcagccgcggaattccagctccaatagcatataactaatgttggtgcagttcgctcgtagcttaatttgagc  
tatatcgcggtcaacactgtaggtcatggctagcaatagttgcataatcgactgtgcataaaccttgatgctcaaggtaggcctt  
tatagggtagatacacagtgcattgttgaacaaggcatctcgcggttagttggtgggcccggggggcaatgattaat  
agggaggagcggggcctcatattgcagggcgagaggtgaaattcggtgacccttgcaagatgtcctacagcgaaagcatt  
ggccaagtgcctccccattagtcagaacgaaagtttggggatcaaaagcagatcagataccgtcgtagtccaaaccataaacta  
tgtcgaccagcgattaggcgggctaccttctcgagagctgcctagcagcttggtgggaaaccatgagtgcttgactctgggg  
ggagtatggtcgcaaggctgaaactaaaggaattgacggaagggcacaccatggagtggagcctgcggcttaatttgactc  
aacacgggaaagcttaccagctcagatatgattaggattgacagactaaaagatctttcatgatctcataagtgggtgcatg  
gtcgttcttagttggtggagtgattgtcagggtcaattccggtaacggacgagacctcgacctgctaactagtggtgattcattctt  
cgattgacgaggcagggtcttgcttgattatagggggcaactctatagtcgggtacgggttgtagtagtctggaggagtggtgatt  
tcaaaaaattaatcttcctagaggtactctggctctaagccagaggaagtccgaggcaataacaggtctgtgatgcccttagat  
atcttgggcccgcacgcgtgctacaatgtaggcgctaagagttttacatccatctccgcaaggagtatgtaatcttggaaatcac  
ctgcgtgattgggcttgacctgtaactgtggtcatcaacgaggaattccttgatgcgcgagtcactatctcgcgcagaatctg  
tcctgccccttgtacacaccgccgctgctcctaccgatcgaacgatcaggtaaagtggacagaggggtcttggaggtccattg  
aacgccg-ttagaggaag

>OM677258.1\_Cavenderia\_protumula\_TH20A

catgcatgtctaagtataagctcttgtagcgctagactgcagacgggctcattacaacgggtgtatcttccagggcatgtcgcaaga  
ccttctggataaccgcagtaaatcggggctaatacatatacaaacggagggatggagagggcaacctgaagtttctgcgatgga  
caattagtattcgaccaaccccgcaagggaatggttgaaccgggtcatattgctaactgactctagcttgctagtagtctgataa  
gctatagacaacccgctatcaactgatggtaaggttttgcttaccatggttgaacgggtaacggggaatcagggttcgatt  
ccggagaggacgctgagaaacggcgctccacatctacgggtggcagcaggcgctaaattgccaatctcaacagagagg  
aggcgggtgacaataaatcccgatggccttgggggcaacccagggctaatacagaataagtacacattaaatcccttaaccaatat  
aattggagggcaagtctggtgccagcagccggtgaattccagctccaatagcatataactaatgttggtgcagttcgctcgtagc  
ttaattttgagctatatcgcggtcaacactgtaggtcatggctagcaatagttgcataatcgactgtgcataaaccttgatgctca  
aggtaggcctttatagggtagatacacagtgcattgttgaacaaggcatctcgcggttagttggtgggcccggggg  
gcaatgattaataggagggagcgggggcttcatattgcagggcgagaggtgaaattcggtgacccttgcaagatgtcctaca

gcgaaagcattggccaagtgcctccccattagtcagaacgaaagttggggatcaaagacgatcagataccgtcgtagtcca  
aaccataaactatgtcgaccagcgattagggcggtaccttctcgagagctgcctagcagcttggtggaaacctagtgctt  
ggactctggggggagtatggctgcaaggctgaaacttaaaggaattgacggaagggcacaccatggagtgagcctgcgg  
cttaatttgactcaacacgggaaagcttaccaagctcagatatgattaggattgacagactaaaagatctttcatgatctcataagt  
gggtggtcatggtcgttcttagttggtggagtgatttgcaggtcaattccggtaacggacgagacctcgacctgctaactagt  
ggattcattctttcgattgacgaggcaggtcttgcttgattatagggggcaactctatagtcgggtacgggttgtagtagtctg  
aggagtggatttcaaaaaattaatcttctagaggtacttctggcttaagccagaggaagtcgagggaataacaggtctgtg  
atgcccttagatatcttgggccgcacgcgtgctacaatgtaggcgctaagagttttacatccatctccgcaaggagtatggtaa  
tcttggaatcacctgcgtgattgggcttgaccactgtaactgtggtcatcaacgaggaattccttgatgcgcgagtcactatctcg  
cgcagaatctgtccctgcccttgtacacaccgcccgtcgtcctaccgatcgaacgatcaggtaaagtggacagaggggtcttg  
gaagtcattgaacgccg - ttagaggaag

>OM677256.1\_Cavenderia\_parvibrachiata\_TH20C

-----gaagaaacctttgc-----

cagacgggcttcacaacgggtgtatcttccagggcatgtcgcaagaccttctggataaccgcagtaaatcggggctaatacata  
caaacggaggggatggagaggggaaccttgaagttctgcgatggacaattagttattcgaccaaccccgcaagggaatgggt  
ggaaccggtcatattgctaactgactctagcttgctagtagtctgataagctatagacaaccgccctatcaactgatggttaagg  
tttggttaccatggttgaacgggtaacggggaatcagggttcgattccggagaggacgcctgagaaacggcgctccacatct  
acgggtggcagcaggcgctaaattgcccaatctcaacagagaggaggcggtgacaataaatcccgatggctttgggggca  
acccaggctaatacagaataagtacacattaaatccctaaccaatataattggaggggcaagtctggtgccagcagccgcggta  
attccagctccaatagcatataactaatgttgtgcagttcgctcgtagcttaattttgagctatatcgcggtcacaactgtaggtcat  
ggtagcaatagttgcataatcgactgtgcataaaccttgatgtcgaaggtaggcctttatagggtagatacacagtgcatggca  
ttgtggaacaaggcatctcgcggttagttggtgggccgcggggcaatgattaataggaggagcgggggccttcatattg  
cagggcgagaggtgaaattcgttgacccttgcaagatgtcctacagcgaaagcattggccaagtgcctccccattagtcaga  
acgaaagtttgggatcaaagacgatcagataccgtcgtagtccaaaccataaactatgtcgaccagcgattaggcgggtac  
cttctcgagagctgcctagcagcttggtggaaacctagagtgccttgactctggggggagtatggtcgcaaggctgaaactta  
aaggaattgacggaagggcacaccatggagtgagcctgcggcttaatttgactcaacacgggaaagcttaccaagctcaga  
tatgattaggattgacagactaaaagatcttcatgatctcataagtggtggtgcatggtcgttcttagttggtggagtgattgtca  
ggtaattccggtaacggacgagacctcgacctgctaactagtgggattcattcttcgattgacgaggcaggtcttgcttgatt  
atagggggcaacttctatagtcgggtacggtttagtagtctggaggagtggatttcaaaaaattaatcttctagaggtacttc  
tggtctaagccagaggaagtccgaggcaataacaggtctgtgatgcccttagatatcttgggccgcacgcgtgctacaatgta  
ggcgctaagtagttttacatccgtctccgcaaggagtagcgttaatttgaatcacctgcgtgattgggcttgaccactgtaact  
gtggtcatcaacgaggaattccttgatgcgcgagtcactatctcgcgcagaatctgtccctgcccttgtacacaccgcccgtcg  
ctcctaccgatcgaacgatcaggtaaagtggacagaggggtcttggaagtccattgaacgccgtttagaggaag

>OM677257.1\_Cavenderia\_parvibrachiata\_2019TH20C

catgcatgtctaagtataagctctgtacggctagactgcagacggctcattacaacgggtgtatcttccagggcatgtcgcaaga  
ccttctggataaccgcagtaaatcggggctaatacatatacaaacggaggggatggagagggcaaccttgaagttctgcgatgga  
caattagttattcgaccaaccccgcaagggaatgggtggaaccggtcatattgctaactgactctagcttgctagtagtctgataa  
gctatagacaacccgctatcaacttgatggtaaggtttggcttaccatggttgaacgggtaacggggaatcagggttcgatt  
ccggagaggacgcctgagaaacggcgctccacatctacgggtggcagcaggcgctaaattgcccaatctcaacagagagg  
aggcgggtgacaataaatcccgatggcttgggggcaacccaggctaatacagaataagtacacattaaatcccttaaccaatat  
aattggagggcaagtctggtgccagcagccgcggtaattccagctccaatagcatataactaatgttgtgcagttcgctcgtagc  
ttaattttgagctatatcgcggtcacaactgtaggtcatggctagcaatagttgcataatcgactgtgcataaaccttgatgtca  
aggtaggcctttatagggtagatacacagtgcatggcattgtggaacaaggcatctcgcggttagttggtggggccgccccg  
gcaatgattaataggaggagcgggggccttcatattgcagggcgagaggtgaaattcgttgacccttgcaagatgtcctaca

gcgaaagcattggccaagtgccctccccattagtcagaacgaaagttggggatcaaagacgatcagataccgtcgtagtcca  
aaccataaactatgtcgaccagcgattaggcgggctaccttctcgagagctgcctagcagcttggtggaaacctagagtgcct  
ggactctggggggagtatggtcgcaaggctgaaactaaaggaattgacggaagggcacaccatggagtgagcctgcgg  
cttaatttgactcaacacgggaaagcttaccagctcagatatgattaggattgacagactaaaagatctttcatgatctcataagt  
ggtggtgcatggtcgcttcttagttggtggagtgattgtcaggtcaattccggtaacggacgagacctcgacctgctaactagt  
ggattcattctttcgattgacgaggcaggctcttgcttgattatagggggcaacttctatagtcgggtacgggtttgtagtagtctgg  
aggagtggatttcaaaaaattaatcttctagagggtacttctggctctaagccagaggaagtcgagggaataacaggctctgtg  
atgcccttagatatcttgggccgcacgcgtgctacaatgtaggcgctaagtgttttacatccgtctccgcaaggagtacggtaa  
tcttggaatcacctgcgtgattgggcttgaccactgtaactgtggtcatcaacgaggaattccttgatgcgcgagtcactatctcg  
cgcagaatctgtccctgcccttgtacacaccgcccgtcgtcctaccgatcgaacgatcaggtaaagtggacagaggggttcttg  
gaagtcattgaacgccgttagagggaa

>OM677255.1\_Cavenderia\_helicoidea\_TH19B

catgcatgtctaagtataagctctgtacggctagactgcagacggctcattacaacgggtgtatctccaggggcatgtcgcaaga  
ccttctggataaccgcagtaaactcggggctaatacacaacggaggggatggagagggaacctgaagttctgcgatgga  
caattagtattcgaccaaccccgcaagggaatggttgaaccggttcatattgctaactgactctagcttgctagtagtctgataa  
gctatagacaacccgcctatcaactgtatggtaaggttttggttaccatggttgaacgggtaacggggaatcaggggtcgatt  
ccggagaggacgcctgagaaacggcgctccacatctacgggtggcagcaggcgctaaattgcccaatctcaacagagagg  
aggcgggtgacaataaatcccgatggctttgggggcaacccagggctaatacagaataagtacacattaaatcccttaaccaatat  
aattggaggggcaagtctggtgccagcagccggttaattccagctccaatagcatataactaatgttggcagttcgctcgtagc  
ttaattttgagctatatcgcggtcaacactgtaggtcatggctagcaatagttgcataatcgactgtgcataaaccttgatgtca  
aggtaggcctttatagggtagatacacagtgcattgtggaacaaggcatctcgcggttagttggtggggccgcgggg  
gcaatgattaataggagggagcgggggcttcatattgcagggcgagaggtgaaattcgttgacccttgaagatgtcctaca  
gcgaaagcattggccaagtgccctccccattagtcagaacgaaagttggggatcaaagacgatcagataccgtcgtagtcca  
aaccataaactatgtcgaccagcgattaggcgggctaccttctcgagagctgcctagcagcttggtggaaacctagagtgcct  
ggactctggggggagtatggtcgcaaggctgaaactaaaaggaattgacggaagggcacaccatggagtgagcctgcgg  
cttaatttgactcaacacgggaaagcttaccagctcagatatgattaggattgacagactaaaagatctttcatgatctcataagt  
ggtggtgcatggtcgcttcttagttggtggagtgattgtcaggtcaattccggtaacggacgagacctcgacctgctaactagt  
ggattcattctttcgattgacgaggcaggctcttgcttgattatagggggcaacttctatagtcgggtacgggtttgtagtagtctgg  
aggagtggatttcaaaaaattaatcttctagagggtacttctggctctaagccagaggaagtcgagggaataacaggctctgtg  
atgcccttagatatcttgggccgcacgcgtgctacaatgtaggcgctaagtgttttacatccatctccgcaaggagtatggtaa  
tcttggaatcacctgcgtgattgggcttgaccactgtaactgtggtcatcaacgaggaattccttgatgcgcgagtcactatctcg  
cgcagaatctgtccctgcccttgtacacaccgcccgtcgtcctaccgatcgaacgatcaggtaaagtggacagaggggttcttg  
gaagtcattgaacgccg-ttagagaagg

>X13160.1\_Physarum\_polycephalum

catgcatgtctaagagcaagtctctt-----

gaatctgcgaacgggtccgcataaccagttgtaaaccatagcaagcggcgcaaggccacagggataacctggtaattcgagg  
ctaatacataccaccgcttcgacccgtaaggggagggcggggtgtgtgaccaggtcgaaatattaactgggagtg---

-----

gcacacgatctgaccaccataccaaacggttatccgcttcgaaagcttcggtgagctgtgtgcttctgacctatcaactagatggc  
agcgtaacggcatgccatggtaacaacgggt-

acagaggataaggggttcgatcctggagagtgggcctgagagattgtcacacttctaaggaaggcagcaggcgcgcaacgt  
tccattgggcaaagctcgaggcggttag-gggacatatgaatgcctgc-----

cttatggtgggcaattcaaatgggactgttttaacatcctatcgagtacaattagaggacaagtctggtgccagcaccgcgggt  
aattccagctctaatagcatacgttaaagttgtgcgggtcgctcgtagtcgggttcagagcctggtcagtgcccagtcacagg

gtcgtcgatcgcggggctcgtaccaatcaccatgattaaaccgtagtgaccaaagcacgtc--  
tttagacgggcacggcacagcatgggac--  
gaaacgcaccggctcgcttttttgcggggcgtgactcggtaaaagcgaaagggatgttcgagggtgaccgaattgctggg  
cgagtggtgaaatacgttgaccctagcaagtcgaccaaaggcgtaagcagtcacaaagggcattcccgttgatcaagagcga  
aagttaaggggtcgaagacgatcagataccgctgtagtcttaactataaatgatgcagaccagggataggaca----  
gtgtccatctcgactcttccgg--  
accttgagaaaatcacgagtcctatgggttctggggggagtatggtcgcaaggctgaaacttaaaggaattgacggaagggca  
ca-  
caaagagtggaaacctgcggttaatttgactcaacacgggaaaactcaccaggtccggatacacgtatgaaagtcaagctgaa  
agactttactcaatgatgtaagtgggtggatggtcgcttcttagttcgtaggattgattgtctggtttattccgataacgagcgaga  
ccccggcgcttctaataaggggtggcagccagaccgctgcaagacaggttagctg-----  
-----ccacctg-----  
aagttatgcttcttagacgtatcagagccgataaggttcttgaaat--  
gggttaataacaggtcagtcatgcccttagatgttctgggccgcacgcggttacaatggcatgtaaacgagtgacaaggcg  
tccacggccgaaggctcgtggttaacccttagtcctgcttgactgggacagatcttgcaattatggtctcaaacgaggaatttt  
agtaatcgaggtcattaacctgcgttgatgcgtccctgccctttgtacacaccgcccgtcgtgctaccgattgggttttacagtt  
acgcgttcggagggctccggggcgctcgccaatacggcctagaggaag
